1 **Arabidopsis hydathodes are sites of intense auxin metabolism and nutrient scavenging**

2

3 **Running title: Physiology of Arabidopsis hydathodes**

4

5 Jean-Marc Routaboul <sup>1\*</sup>, Caroline Bellenot <sup>1</sup>, Gilles Clément <sup>2</sup>, Sylvie Citerne <sup>2</sup>, Céline  
6 Remblière <sup>1</sup>, Magali Charvin <sup>3</sup>, Lars Franke <sup>4#</sup>, Serge Chiarenza <sup>5</sup>, Damien Vasselon <sup>2</sup>, Marie-  
7 Françoise Jardinaud <sup>1</sup>, Sébastien Carrère <sup>1</sup>, Laurent Nussaume <sup>5</sup>, Patrick Laufs <sup>2</sup>, Nathalie  
8 Leonhardt <sup>5</sup>, Lionel Navarro <sup>3</sup>, Martin Schattat <sup>4</sup>, Laurent D. Noël <sup>1\*</sup>

9

10 <sup>1</sup> LIPME, Université de Toulouse, INRAE/CNRS, UMR 0441/2598, F-31326 Castanet-  
11 Tolosan, France

12 <sup>2</sup> Université Paris-Saclay, INRAE, AgroParisTech, Institut Jean-Pierre Bourgin (IJPB), 78000,  
13 Versailles, France.

14 <sup>3</sup> Institut de Biologie de l'Ecole Normale Supérieure (IBENS), CNRS UMR8197, INSERM  
15 U1024, 75005 Paris, France

16 <sup>4</sup> Department of Plant Physiology, Institute for Biology, Martin-Luther-University Halle-  
17 Wittenberg, D-06120 Halle (Saale), Germany

18 <sup>5</sup> Institut de Biosciences et Biotechnologies d'Aix-Marseille, Aix-Marseille Université, CEA  
19 and CNRS UMR 7265, F-13108 Saint Paul-Les-Durance, France

20 \*Address for correspondence:

21 Jean-Marc Routaboul, [jean-marc.routaboul@inrae.fr](mailto:jean-marc.routaboul@inrae.fr), ORCID:0000-0003-2197-5280

22 Laurent D. Noël, [laurent.noel@inrae.fr](mailto:laurent.noel@inrae.fr), ORCID: 0000-0002-0110-1423

23 #Present address: Institute of Biochemistry and Biotechnology, Charles Tanford Protein Center,  
24 Martin Luther University Halle-Wittenberg, Kurt-Mothes-Str. 3a, D-06120 Halle (Saale),  
25 Germany.

26 **Abstract (249/250 words)**

27 Hydathodes are small organs located on the leaf margins of all vascular plants. They release  
28 excess xylem sap through guttation when stomata are closed or when the humidity level is high.  
29 Many promoter analyses have suggested other hydathode functions in metabolite transport and  
30 auxin metabolism, but experimental demonstration is still lacking. Here, we compared the  
31 transcriptomic and metabolomic features of mature *Arabidopsis* hydathodes to the leaf blade.  
32 1460 differentially-expressed genes were identified revealing that genes related to auxin  
33 metabolism, transport, stress, DNA, plant cell wall, RNA or wax were on average more  
34 expressed in hydathodes. On the other hand, genes involved in glucosinolate metabolism,  
35 sulfation pathway, metal handling or photosynthesis were downregulated in hydathodes. In  
36 hydathodes, there are an increased expression of auxin transcriptional regulators and  
37 biosynthetic genes, a lower expression of auxin transport genes and a differential expression of  
38 genes related to its vacuolar storage that is consistent with increased contents of free and  
39 conjugated auxin. We also found that ca. 78% of the total content of 52 xylem sap metabolites  
40 were removed from guttation fluid at the hydathode level. Using reverse genetics, we showed  
41 that the capture of nitrate and phosphate in the guttation fluid relies on the *NRT2.1* and *PHT1;4*  
42 transporters, respectively. Thus, hydathodes absorb a significant part of xylem sap nutrients,  
43 limiting the loss of valuable chemicals during guttation. Our transcriptomic and metabolomic  
44 analyses reveal an organ with its own transcriptomic and physiological identity and highlight  
45 hydathode biological processes that may impact the whole plant.

46 **One sentence summary:** Transcriptome and physiological analysis of mature and healthy  
47 hydathodes of *Arabidopsis* demonstrates that those organs are sites of intense auxin metabolism  
48 and nutrient scavenging

49

50 **Keywords:** Arabidopsis, hydathode, auxin, epithem, transport, transcriptome, nitrate,  
51 phosphate, defense.

## 52 **Introduction**

53 A sustained flow of xylem sap from the roots to the shoot supplies both water, organic and  
54 inorganic solutes to the shoot of vascular plants. Occasionally, roots may deliver more water  
55 than leaves can evaporate when stomata are closed or when the humidity level or atmospheric  
56 CO<sub>2</sub> levels are high. This excess of water could potentially result in a harmful flooding of the  
57 leaf intercellular spaces. Prevention of flooding relies on guttation, i.e. the release of the excess  
58 of xylem sap at the leaf margin thanks to specialized organs named hydathodes (Feild et al.,  
59 2005; Cerutti et al., 2019; Bellenot et al., 2022). Hydathodes are found in all vascular plants  
60 and their anatomy has been described in numerous species (Perrin, 1972; Cerutti et al., 2017;  
61 Cerutti et al., 2019; Jauneau et al., 2020). This multilayered organ is composed of an outer  
62 epidermis containing water pores that resemble stomata but are associated with distinct  
63 functions. While stomata regulate the exchange of gases (water vapor, CO<sub>2</sub> and O<sub>2</sub>), hydathode  
64 water pores are specialized in the secretion of liquid. Hydathodes also contain an inner  
65 parenchyma called epithem irrigated by a highly branched and hypertrophied xylem system.  
66 The number and position of hydathodes are specified very early during leaf morphogenesis and  
67 are tightly associated with leaf margin development and leaf serration patterns (Maugarny-  
68 Cales and Laufs, 2018).

69 Although known to botanists for several centuries, our current knowledge on hydathode  
70 physiology is very limited. Hydathodes are mostly proposed to be important organs for auxin  
71 synthesis and signaling since numerous genes relevant for auxin biosynthesis, transport or  
72 signaling are expressed in hydathodes including the auxin reporter *DIRECT REPEAT5 (DR5)*,  
73 a synthetic promoter that acts as a readout for auxin activity (Sabatini et al., 1999; Aloni et al.,  
74 2003; Alvarez et al., 2009; Eklund et al., 2010; Wang et al., 2011; Muller-Moule et al., 2016).  
75 Additionally, auxin itself has also been immuno-localized in Arabidopsis hydathodes (Aloni et  
76 al., 2003). The *YUCCA 4* gene important for auxin synthesis and four genes relevant for auxin

77 signaling are more expressed in *Arabidopsis* hydathodes compared to other leaf tissues (Kim et  
78 al., 2021; Yagi et al., 2021). The analysis of multiple mutants of the redundant  
79 *YUCCA* biosynthetic genes have shown the importance of auxin synthesis for leaf, veins and  
80 hydathode development (Cheng et al., 2006, 2007; Wang et al., 2011; Chen et al., 2014).

81 Many genes coding for transporters are also preferentially expressed in the hydathodes of  
82 *Arabidopsis*, rice or barley (Mudge et al., 2002; Shibagaki et al., 2002; Nazoa et al., 2003; Pilot  
83 et al., 2003; Pilot et al., 2004; Nagai et al., 2013; Bailey and Leegood, 2016). Amino acids (Pilot  
84 et al., 2004; Bailey and Leegood, 2016) or ions such as  $\text{NO}_3^-$ ,  $\text{PO}_4^-$ , or  $\text{K}^+$  (Nagai et al., 2013)  
85 are generally less concentrated in the guttation fluid than in the xylem sap suggesting that  
86 hydathodes may capture xylem metabolites that have not been used by the leaf (Perrin, 1972;  
87 Pilot et al., 2004; Nagai et al., 2013; Bailey and Leegood, 2016). Absorption of ions by the  
88 hydathodes would prevent excessive loss of these valuable nutrients during guttation. Some  
89 other examples of promoter:*GUS* fusions with hydathode-specific expression profiles are given  
90 in Supplemental Table S1.

91 Healthy hydathodes have been reported to host a rich microbial community (Perrin et al., 1972).  
92 Several vascular bacterial pathogens of the *Xanthomonas* and *Clavibacter* genera have evolved  
93 to colonize this niche and can infect hydathodes (Lewis and Goodman, 1966; Carlton et al.,  
94 1998; Hugouvieux et al., 1998; Cerutti et al., 2017; Bernal et al., 2021; Mullens and Jamann,  
95 2021). In contrast to stomata, hydathode pores seem unable to fully close and may thus facilitate  
96 pathogen entry and infection (Cerutti et al., 2017). Yet, immune responses of hydathodes are  
97 poorly characterized.

98 Despite the biological importance of hydathodes, only few molecular, developmental and  
99 physiological analyses have been reported. A transcriptomic analysis of macrodissected  
100 *Arabidopsis* hydathodes identified 68 genes which are differentially expressed compared to the  
101 leaf blade of three-week-old *in vitro*-grown plants (Yagi et al., 2021). A single cell

102 transcriptomic profiling of Arabidopsis leaf tissues has also found a cluster of 98 genes assigned  
103 to the hydathodes (Kim, 2021 #8350}. Thus, the transcriptomic signature of the hydathode  
104 tissue remains mostly unexplored.

105 In this study, a deep transcriptomic description of mature Arabidopsis hydathodes and a detailed  
106 metabolomic analysis of guttation fluid were conducted. We revealed that auxin metabolites  
107 accumulate at hydathodes in agreement with the increased expression of most genes relevant  
108 for the auxin synthesis, transport, storage and signaling. We also demonstrate that two key  
109 macronutrient transporter genes strongly expressed in hydathodes limits the loss of nitrate and  
110 phosphate in guttation fluid. This study provides a foundation for further physiological studies  
111 of hydathodes.

112

## 113 **Results**

### 114 **Hydathodes possess a transcriptomic signature distinct from the leaf blade**

115 To shed light on the physiological properties of hydathodes, we performed a transcriptomic  
116 analysis by RNA sequencing (RNA-Seq) on macrodissected hydathode-enriched samples  
117 *versus* leaf blade tissues (comprising mesophyll, stomata, epidermis and some minor veins) of  
118 nine- to ten-week-old Arabidopsis plants of Col-0 accession (Figure 1A). Four biological  
119 replicates of leaf teeth and leaf blade samples were manually collected using a razor blade.  
120 RNA sequencing information about the libraries, number of reads and percentage of raw reads  
121 mapped uniquely to the annotated sequences of *Arabidopsis thaliana* chromosomes are given  
122 (Supplemental Table S2). The clustering analysis using Euclidean distance showed that  
123 hydathode and leaf blade samples clustered in separate groups, indicating distinct  
124 transcriptomic signatures (Supplemental Figure S1A). The differential gene expression analysis  
125 identified 1460 differentially expressed genes in hydathodes (DEG, FDR<0.001, log<sub>2</sub> fold

126 change  $>0.6$ ), including 610 up-regulated and 850 down-regulated genes (Figure 1B and  
127 Supplemental Table S3).

128 These DEGs were classified by Mapman analysis into functional categories in order to search  
129 for enriched functional categories in each sample (Supplemental Figure S1). DEG annotation  
130 was manually refined based on the current literature (Supplemental Table S3). DEGs involved  
131 in auxin metabolism, stress, DNA, plant cell wall, transport, RNA or lipids were on average  
132 more expressed in hydathodes (Figure 1B). On the other hand, glucosinolate synthesis and  
133 transport, the sulfation pathway, metal handling or photosynthesis were on average upregulated  
134 in the leaf blade. Both auxin- and glucosinolate-related DEG Mapman sub-categories were  
135 extracted from the main categories. Consistent with these functional categories, the twenty most  
136 DEGs are related to auxin metabolism (i.e. *STY1*, *STY2*, *YUC4*, *YUC5*), transport (*NRT2.1*,  
137 *NIP3;1*), stresses (defensin, disease resistance, chitinase, ABA-induced, *CYP714A1*) or cell  
138 wall (PGL1-pectin lyase-like family, Pollen Ole e 1 like) that are likely marker genes of  
139 hydathodes (Table 1). The hydathode transcriptomic signature thus appears distinct from the  
140 leaf blade and identifies contrasted biological functions between the hydathode-enriched  
141 sample and the leaf blade.

142

### 143 **Independent validations of the hydathode sampling and transcriptomic results**

144 In order to verify the robustness of our transcriptomic results, we first compared published  
145 reports of promoter:*GUS* reporter lines with our results (Supplemental Table S1). Out of 41  
146 promoter:*GUS* reporter lines which display preferential GUS activity in hydathodes, 33 showed  
147 significant and positive  $\log_2FC$  in our transcriptomic analysis (Average  $\log_2FC=2.0$ ).  
148 Reciprocally, out of 12 promoter:*GUS* reporter lines which display preferential GUS activity in  
149 the leaf blade, 11 showed significant and negative  $\log_2FC$  in our transcriptomic analysis  
150 (Average  $\log_2FC=-1.4$ ). These genes are for instance relevant for glucosinolate metabolism

151 (Schuster et al., 2006; Gigolashvili et al., 2007; Redovnikovic et al., 2012) or glutamine  
152 transport (Pratelli et al., 2010). Because most of these studies were conducted on young *in vitro*-  
153 grown seedlings, we studied the expression of several DEG thanks to existing promoter:*GUS*  
154 reporter lines in eight-week-old plants. In hydathodes, the *YUCCA 2, 5, 8* and *9* genes as well  
155 as the *TAA1* auxin biosynthesis gene and *PHT1;4* phosphate transporter gene were all intensely  
156 expressed in mature hydathodes (Supplemental Figure S2). These results are consistent with  
157 our transcriptomic results obtained at the same plant age. In addition, the *DR5:GUS* reporter  
158 was specifically active at the tip of the hydathodes compared to *YUCCA* and *TAA1* genes  
159 (Supplemental Figure S2), consistent with previous reports (Aloni et al., 2003) and higher auxin  
160 signaling at hydathodes (Supplemental Table S3). Observation of the *DR5:VENUS* reporter  
161 showed that strong auxin signaling was not uniform throughout the hydathode epithem but was  
162 higher in the epithem region close to the vasculature (Supplemental Figure S3). In contrast to  
163 these genes preferentially expressed in hydathodes, *GDU4.7* encoding the glutamine vascular  
164 transporter (Pratelli et al., 2010) is expressed in the vasculature but not in the hydathodes in  
165 agreement with our transcriptomic results (Supplemental Table S3 and Supplemental Figure  
166 S2).

167 We also compared our results with previous transcriptomic studies, which identified 68  
168 *Arabidopsis* genes more expressed in hydathodes relative to the leaf tissues surrounding the  
169 hydathode and a single cell transcriptomic cluster of 98 genes putatively corresponding to  
170 hydathode cell types (Kim et al., 2021; Yagi et al., 2021). Sixty five out of 68 and 47 out of 98  
171 were also differentially enriched in our hydathode samples, respectively. Our hydathode  
172 samples also shared 74%, 45% and 39% of DEGs with the clusters corresponding to guard cells,  
173 epidermis and vasculature which are components of the hydathode organ (Kim et al., 2021). In  
174 contrast, mesophyll parenchyma shared only 15% of DEGs more expressed in the hydathode.



175 Last but not least, novel promoter:*GUS* reporter transgenic lines were constructed using the 2-  
176 kb region upstream of the ATG of four genes amongst the most differentially expressed genes:  
177 AT3G16670 (Pollen OLE 1), AT3G05730 (defensin-like), AT1G62510 (lipid transfer protein)  
178 and AT1G56710 (PGL1: Pectin Lyase-like family) (Table 1, Supplemental Table S3). All four  
179 promoters were specifically active in hydathodes (Figure 2). Three were specifically restricted  
180 to this organ in leaves while AT1G62510 also exhibited a weak and diffuse expression in leaf  
181 blade.

182 Altogether, these results indicate that the hydathode samples were indeed enriched in hydathode  
183 tissue and that our transcriptomic results are valid. We thus mined this dataset to get further  
184 insights into hydathode physiology.

185

### 186 **Hydathodes are major sites for auxin metabolism, storage, transport and signaling**

187 Because many genes important for auxin metabolism were reported to be expressed in  
188 hydathodes (Supplemental Table S3 for some examples), we measured the accumulation of free  
189 auxin by mass spectrometry in hydathodes and leaf blades (Figure 3A). Thirty seven percent  
190 more free auxin was measured in hydathodes. Such auxin gradient could be established by  
191 differential auxin synthesis and/or transport. The transcriptomic dataset shows that 42/67 genes  
192 relevant for auxin metabolism were upregulated in hydathodes (Figure 3B). Those genes encode  
193 key biosynthetic enzymes such as TAA1, AO1 or six YUCCA (Average  $\log_2FC=3.2$ ) and  
194 positive regulators from the NGA, SHI or TCP transcription factor families (Average  $\log_2FC$   
195 2.5, Figure 3B and Supplemental Table S3). Therefore, hydathodes are definitely organs of  
196 active auxin synthesis in mature leaves. In contrast, auxin transport seems globally repressed.  
197 Genes encoding auxin efflux carriers PIN-formed *PIN1* (basipetal transport, Galweiler et al.,  
198 1998) or *PIN5* (cytosol to ER transport, Mravec et al., 2009) were less expressed in hydathodes  
199 (Figure 3C). Their positive regulators *GOLVEN SECRETORY PEPTIDE GLV1* and *GLV2* and

200 *PINOID-BINDING PROTEIN (PBPI)* are also less expressed in hydathodes (Benjamins et al.,  
201 2003; Whitford et al., 2012; Ghorbani et al., 2016; Barbosa et al., 2018) while their negative  
202 regulator *MACCHI-BOU4 (MAB4)* is more expressed (Furutani et al., 2014). Parallel to PIN-  
203 mediated transport, the *LAX2* transporter gene from the *AUX/LAX* family, known to be  
204 expressed in the leaf vasculature except along the leaf margin, was less expressed in hydathodes  
205 (Kasprzewska et al., 2015). The ATP-binding cassette (ABC) *ABCB14*, which promotes local  
206 influx of auxin was upregulated in hydathodes (Kaneda et al., 2011). The vacuolar storage of  
207 auxin at hydathodes could also be promoted by both increasing expression of two IAA-amido  
208 synthetase *GH3* that conjugate and inactivate excess IAA to amino acids (Staswick et al., 2005)  
209 and by reducing expression of *WALLS ARE THIN1 (WATI)* that encodes a tonoplastic  
210 transporter important for auxin export (Ranocha et al., 2013). We measured auxin storage  
211 capability by quantifying oxindole-3-AIA, which is a down-product of this inactivation  
212 pathway (Hayashi et al., 2021). Oxindole-3-AIA was 22% more abundant in hydathodes  
213 compared to the leaf blade samples (Figure 3C). Finally, we also observed a specific auxin  
214 signaling and response in the hydathode. Two main families of transcription factors regulate  
215 the expression of auxin response genes (Guilfoyle and Hagen, 2007). Auxin Response factors  
216 (ARFs) are repressed by AUXIN/INDOLE ACETIC ACID (Aux/IAA) proteins. In response to  
217 auxin, the degradation of Aux/IAs by the proteasome releases the ARFs that bind to the auxin-  
218 responsive cis-acting element of early auxin response gene promoter, including Aux/IAs,  
219 small auxin-up RNAs (SAURs) and GH3 proteins. We found that IAA28 and IAA29 and ARF  
220 3, 4 and 18 were more expressed in hydathodes (Figure 3A). In addition, two other transcription  
221 factors WRKY57 and MYB77 were also differentially expressed. WRKY57 interacts with  
222 IAA29 and is regulated by auxin (Jiang et al., 2014). MYB77 interacts with ARF to increase  
223 auxin response (Shin et al., 2007). AIR3, SAUR 17, SAUR32 and SAUR36 or Big Grain 1

224 (BIG1) have also been shown to be activated in response to auxin (Xie et al., 2000, Hou, 2013  
225 #8423; Mishra et al., 2017).

226 Altogether, our transcriptomic analysis is consistent with hydathodes being sites of auxin  
227 synthesis and signaling as a result of increased auxin synthesis, lower basipetal transport and  
228 higher vacuolar storage.

229

### 230 **Transporters expressed in hydathodes prevent excessive loss of metabolites during** 231 **guttation**

232 According to our transcriptome analysis of hydathode and leaf blade tissues, over 64 transporter  
233 genes are preferentially expressed in hydathodes (Table 2). These include genes coding for  
234 transporters of water, ions (nitrate, phosphate, sulfate, calcium, zinc, iron, copper, chloride,  
235 boron arsenate), hormones (ABA, GA, auxin, cytokinins), sugars, peptides, waxes and other  
236 organic compounds. This is in agreement with previous observations showing that genes  
237 encoding transporters for nitrate (*NRT1.1* and *NRT2.1*) and inorganic phosphate (Pi, *PHT1;4*)  
238 are expressed in hydathodes (Nazon et al., 2003; Misson et al., 2004; Krouk et al., 2010).

239 These observations suggest that transporters inside hydathodes could actively modify guttation  
240 fluid composition. In order to test this hypothesis, guttation was sampled at the border of a half  
241 leaf from which the margin was excised, as a proxy of a pre-hydathode xylem sap sample. Its  
242 composition was compared by GC-MS to the genuine guttation fluid from the intact other half  
243 leaf and xylem sap exuding from the petiole (Figure 4A). Only 9% and 2% of the initial  
244 metabolites relative to the petiole sample are remaining in the pre-hydathode and guttation fluid  
245 samples, respectively. This indicates that both the leaf tissues and the hydathodes capture  
246 metabolites from the xylem sap. The concentrations of 23 metabolites (including 13 amino  
247 acids, 5 organic acids, 4 sugars and myo-inositol,  $p < 0.05$ ) in the guttation fluid were  
248 significantly lower than in the pre-guttation samples (Figure 4B). A significant uptake of Pi and

249 nitrate in the hydathodes was also measured (Figure 4C and D). Lower concentrations of  
250 phosphorus, calcium and magnesium but not ammonium nor potassium were measured by ICP-  
251 MS in the guttation fluid relative to the pre-hydathode fluid (Figure 4E). These results indicate  
252 that the hydathodes significantly and specifically retains given organic and mineral compounds  
253 before guttation occurs.

254 In order to determine the biological significance of transporters in guttation fluid composition,  
255 the guttation fluid composition of the *nrt2.1* and *pht1;4* mutants was determined for nitrate and  
256 Pi, respectively. Higher concentrations of nitrate and Pi were measured in the guttation fluid of  
257 *nrt2.1* and *pht1;4* mutants compared to wild-type plants, respectively (Figure 5). This indicates  
258 that *NRT2.1* and *PHT1;4* contribute actively to the scavenging of nitrate and Pi from the  
259 guttation fluid, respectively. The contribution of the other transporters to the retrieval of the  
260 other substrates remains to be determined.

261 Taken together, those results demonstrate that Arabidopsis hydathodes are active sites of  
262 transporter-mediated scavenging of small organic and inorganic compounds, which limits the  
263 loss of valuable nutrients during guttation.

264

## 265 **Several physiological processes contributing positively to immunity are dampened in** 266 **hydathodes**

267 The transcriptomic data also indicates that genes relevant to plant constitutive (cuticular wax  
268 and cutin metabolism, cell wall modification and degradation, inhibitory chemicals or proteins  
269 synthesis) and induced defenses (glucosinolate synthesis, hormone crosstalks) were  
270 differentially expressed in the hydathodes as compared to the leaf blade, as illustrated for  
271 instance with the significant higher number of DEGs related to the “Stress” functional category  
272 (Supplemental Figure S1, Table 3 and Supplemental Table S3).

273 *Wax and cutin metabolism*

274 The functional category “lipid metabolism” was significantly enriched in our dataset (Figure  
275 1B and Supplemental Figure S1C) and a significant number of genes related to lipid signaling,  
276 waxes and cutins synthesis and transport were found to be more expressed in hydathodes  
277 (Supplemental Table S3). Most glycerolipid-related genes were downregulated, such as *MGDC*  
278 that is also a marker of phosphate starvation (Kobayashi et al., 2009). The most differentially  
279 expressed gene was *WSD1* with a log<sub>2</sub>FC of 4.2. *WSD1* drives the conversion of primary  
280 alcohols into esters and is expressed in hydathodes (Li et al., 2008). Waxes and cutins that  
281 compose the cuticle are composed of five classes, i.e. acids, aldehydes, alcohols, alkanes,  
282 ketones and esters. In contrast to the stem, the leaf only contains minute amounts of esters  
283 (Patwari et al., 2019). This increased *WSD1* expression in hydathodes could thus favor the  
284 accumulation of wax esters, similar to the one observed in stems. Unfortunately, analysis of the  
285 hydathode wax ester would require large amounts of plant material that are for now not adapted  
286 to the small hydathode size. Lipophilic cuticles on leaf surfaces represent a protection against  
287 water loss or microbes. It would thus be interesting to investigate to what extent these putative  
288 wax modifications around the hydathodes might facilitate or impair infection by microbes.

### 289 *Cell wall degradation and modification*

290 We examined the 44 cell wall-related DEGs, refining the annotation with Arabidopsis literature  
291 (Supplemental Table S3). Three *Pectin Lyase-like (PLs)* and four *Pectin Methyl Esterase*  
292 *inhibitors (PMEIs)* genes are upregulated in hydathodes when the *MEPCRA Pectin Methyl*  
293 *Esterase (PME)* (Coculo and Lionetti, 2022) and *Pectin Acetyl Esterase (PAE2)* are all down  
294 regulated. Pectins constitute up to ~50% of Arabidopsis leaf walls (Zablackis et al., 1995) and  
295 are especially important in the middle lamella, acting as glue between the walls of two adjacent  
296 cells thus preventing the cells from separating or sliding against each other (Zamil and  
297 Geitmann, 2017). PME catalyzes the demethoxylation of pectin and thus favors cell to cell  
298 adhesion through the formation of calcium bridges. PMEs are inhibited by PMEIs in a finely-

299 tuned process (Driouich et al., 2012). Pectins could also be degraded by PLs that are more  
300 specifically active on the highly methyl esterified pectins (Yadav et al., 2009). Thus, the high  
301 expression of these plant cell wall genes in hydathodes correlates well with the structural  
302 specificities of the hydathode cell wall, especially the loose cellular connections observed in  
303 the epithem (Cerutti et al., 2017; Cerutti et al., 2019).

#### 304 *Inhibitory chemicals and proteins*

305 Several genes involved in flavonoid and lignin synthesis were all less expressed in hydathodes  
306 compared to the leaf blade, including the flavonoid activator *MYB75* while the dual flavonoid  
307 and lignin repressor *MYB4* was more expressed (Wang et al., 2020) (Supplemental Figure S4).  
308 In agreement, phloroglucinol staining revealed lignin deposition in the secondary cell wall in  
309 the vasculature but not in the upper part of the hydathode (Supplemental Figure S4). Five genes  
310 encoding chitinases which degrade chitin were more expressed inside hydathodes (Table 3).  
311 Last, among the most differentially expressed genes, we noted two extensin-related genes  
312 (*Pollen Ole 1 like AT3G16670* and *AT3G16660*) and a *defensin-like* (*AT3G05730*) coding for  
313 small proteins. These presumably excreted small proteins share very similar gene expression  
314 profiles and their expression enhances plant resistance to biotic or oxidative stresses (Ascencio-  
315 Ibanez et al., 2008; Luhua et al., 2008) (Table 3).

#### 316 *Plant inducible defenses*

317 *ICS1*, *ICS2*, *PBS3* and *EDS5*, important genes for SA synthesis and *DRM6*, involved in SA  
318 homeostasis, were downregulated in healthy hydathodes (Table 4) (Garcion et al., 2008; Zhang  
319 et al., 2017; Rekhter et al., 2019; Torrens-Spence et al., 2019). Accordingly, basal expression  
320 of SA-responsive genes *WRKY70*, *PATHOGENESIS-RELATED PROTEIN 2 (PR2)* and  
321 *PHYTOALEXIN-DEFICIENT 4 (PAD4)* was reduced (Zhou et al., 1998; Li et al., 2004; van  
322 Loon et al., 2006). To test for a reduced synthesis of SA inside hydathodes, we quantified SA  
323 by mass spectrometry (Figure 6). However, we did not measure any significant difference in

324 SA content. In contrast, hydathodes contained higher concentrations of ABA and less JA  
325 compared to the leaf blade (Figure 6). Accordingly, expression of the ABA biosynthetic gene  
326 *NCED5* and two ABA-responsive genes was upregulated, whereas expression of the ABA  
327 negative regulator *RCK1* was downregulated (Table 4). Expression of *LOX1* and *LOX5* which  
328 synthesize the 9(S)-hydroxy-10,12,15-octadecatrienoic acid oxylipin was reduced consistent  
329 with the lower JA content and also suggests a reduced accumulation of callose, ROS and  
330 defense-related genes upon hydathode infection (Lopez et al., 2011; Yang et al., 2021). Higher  
331 expression of *UGT85A1* involved in cytokinin glycosylation is also consistent with the higher  
332 content of glycosylated cytokinins measured in hydathode (Jin et al., 2013) whereas a lower  
333 expression of *IPT3*, a key determinant of cytokinin biosynthesis in the vasculature was also  
334 expected (Nobusawa et al., 2013). Last, genes involved in the synthesis of glucosinolates, which  
335 are *Brassicaceae*-specific secondary metabolites promoting plant immunity, were also more  
336 expressed in the leaf blade, consistent with a high expression in vascular tissues (Schuster et  
337 al., 2006; Redovnikovic et al., 2012) (Supplemental Table S3).

338 Altogether, basal immunity of healthy hydathodes seems lower than in the leaf blade, especially  
339 SA metabolism, and supports the observation that healthy hydathodes may host a rich microbial  
340 community (Perrin, 1972). Yet, inducible immune responses upon infection by microbes  
341 remain to be determined.

342

## 343 **Discussion**

### 344 **Hydathodes have a unique transcriptomic identity within the leaf**

345 This analysis identified 1460 genes that are differentially expressed in hydathodes of mature  
346 *Arabidopsis* leaves compared to the neighboring leaf blade tissue and is fully consistent with  
347 two recent transcriptomic reports (macrodissected tissues and single cells) which together  
348 identified 162 genes preferentially expressed in hydathodes (Kim et al., 2021; Yagi et al., 2021).

349 This work provides a much broader insight into the molecular bases of hydathode physiology  
350 and defines a multilayered tissue that is not only structurally, but also physiologically different  
351 from neighbor tissues. Because macrodissection yields some contamination by the surrounding  
352 mesophyll tissue, both the number of differentially-expressed genes and the intensity of the  
353 differential expression are likely underestimated. Only microdissection of hydathode tissues or  
354 deeper single cell analyses could further refine the quality of those results. Studying the  
355 conservation of those hydathode-specific expression patterns in other plant species would also  
356 be of great interest.

357

### 358 **Hydathode transporters prevent the loss of metabolites in the guttation fluid**

359 Significant amounts of xylem sap metabolites reach the hydathodes where many transporters  
360 are more expressed. The efficient scavenging of metabolites such as nitrate, Pi, amino acids and  
361 sugars could prevent their loss by guttation. We showed that the *NRT2.1* and the *PHT1;4* high  
362 affinity transporters of nitrate and phosphate, respectively, are preferentially expressed in  
363 hydathodes (Mudge et al., 2002; Nazoa et al., 2003) and are involved in the active capture of  
364 nitrate and Pi in the guttation fluid. In the roots, both *NRT2.1* and *PHT1;4* are major players  
365 for nitrate and Pi uptake from the soil (Filleur et al., 2001; Misson et al., 2004; Shin et al., 2004;  
366 Li et al., 2007). Their expression is strongly upregulated by low concentrations of nitrogen  
367 (nitrate/ammonium/glutamine) and phosphate, respectively (Nazoa et al., 2003; Misson et al.,  
368 2004). Yet, both *NRT2.1* and *PHT1;4* expression in hydathodes is decorrelated from the local  
369 nutritional status of the hydathodes as illustrated by the low expression of starvation markers  
370 for phosphate (e.g. *MGDC*, Awai et al., 2001; Kobayashi et al., 2009) and nitrate  
371 (*NPF7.3/NRT1.5*, Cui et al., 2019). Molecular and genetic mechanisms for such hydathode-  
372 specific and starvation-independent expression of those transporters remain to be elucidated.



373 For any microbe, the metabolites that could be present in the guttation fluid could represent  
374 valuable nutrients. In the bacterial pathogen *Xanthomonas campestris* pv. *campestris*, the causal  
375 agent of back rot disease in *Brassicaceae*, the expression of transporters of inorganic phosphate  
376 (Pi), sulfur or nitrogen was upregulated inside cauliflower hydathodes (Luneau et al., 2022) and  
377 Pi uptake limits growth inside hydathodes (Luneau et al., 2022; Luneau et al., 2022). This  
378 suggests that active scavenging of nutrients in hydathodes could limit proliferation of microbes  
379 and contribute to the immunity of this organ, otherwise fully exposed to the epiphytic microbes.

### 380 **Hydathodes produce and accumulate auxin and its conjugates**

381 Direct hormone quantification showed that both free auxin and oxindole-3-AIA, a down-  
382 product of the auxin storage and inactivation pathway (Hayashi et al., 2021) accumulate in  
383 hydathodes. During leaf margin differentiation, such auxin maxima promote serration  
384 outgrowth through cell proliferation and patterning (Kawamura et al., 2010; Kasprzewska et  
385 al., 2015). Auxin also plays a role during xylem specification and differentiation and may  
386 explain the very dense atypical delta shape structure of the xylem irrigating the epithem (Aloni,  
387 2013; Kondo et al., 2014). More than 67 genes involved in auxin biosynthesis, regulation,  
388 signaling, conjugation and response are upregulated in hydathodes thus confirming and  
389 extending our knowledge about the importance of auxin metabolism in hydathode biology. This  
390 includes several *YUCCA* genes that encode flavin monooxygenase-like enzymes that catalyze  
391 the rate-limiting step in Trp-dependent auxin biosynthesis and *TAA1* which performs the first  
392 committed steps of auxin synthesis. In contrast, expression of several auxin-related transporters  
393 genes was down-regulated. These observations are in agreement with the hypothesis of a higher  
394 accumulation of auxin in hydathodes (Aloni et al., 2003). This is also supported by the  
395 overexpression in hydathode of numerous copies of auxin biosynthesis regulators belonging to  
396 the *STYLISH*, *NGA* or *TCP* families or differential expression of many auxins signaling genes

397 belonging to the AUX-IAA, ARF and SAUR families. Yet, the exact biological functions of  
398 such a high auxin metabolism in fully differentiated and mature hydathodes remains enigmatic.

399

400 These transcriptomic and physiological results provide molecular insights on how hydathodes  
401 actively scavenge xylem sap-derived metabolites and establish a robust foundation for future  
402 hydathode research.

403

## 404 **Materials and methods**

### 405 **Plant material and growth conditions**

406 Arabidopsis (Accession Col-0 or Ws-4 and mutant lines) was grown in a growth chamber on  
407 *Jiffy-7*<sup>®</sup> peat pellets (<http://www.jiffypot.com>) under short-day conditions (8h light, 100-  
408 120 $\mu$ E). Promoter:*GUS* reporter lines were obtained from NASC stock center: *TAA1*, N66987;  
409 *YUC2*, N69892; *YUC5*, 69894; *YUC8*, N69897; *YUC9*, N69945. *DR5-GUS* and *pht1;4-1*  
410 mutant (Ws-4 ecotype; (Misson et al., 2004)) and *pGDU4-1-GUS* reporter line from Guillaume  
411 Pilot (Virginia Tech, Blacksburg, VA 24061, USA). The *DR5:VENUS* line was described in  
412 Maugarny Cales *et al.* (2019) and the E325-GFP enhancer line used as a hydathode marker line  
413 (Yagi et al., 2021) was obtained from the NASC stock center.

414

### 415 **Tissue sampling for transcriptomic**

416 Hydathodes were harvested on nine- to ten-week-old Arabidopsis plants. Teeth containing the  
417 hydathode on the distal part of intermediate and/or fully extended leaves and leaf blade samples  
418 (comprising mesophyll, stomata, epiderm and some minor veins) were excised with a razor  
419 blade. Samples were directly frozen in liquid nitrogen and stored at -80°C until RNA extraction.  
420 The sampling was performed for four biological replicates over a period of one year.

### 421 **RNA extraction, sequencing and differential expression analyses**

422 RNA extraction was performed as described (Chomczynski, 1993). Global gene expression  
423 profiles were determined by replicated strand-specific Illumina RNA-Seq. Paired-end oriented  
424 RNA sequencing (2x150 pb) was performed on an Illumina HiSeq3000 using the Illumina  
425 HiSeq3000 Reagent Kits. Paired-end reads were mapped on the reference Arabidopsis genome  
426 using the glint software (release 1.0.rc12.826:833, [http://lipm-bioinfo.toulouse.inra.fr/  
427 download/glint](http://lipm-bioinfo.toulouse.inra.fr/download/glint)). Only best-scores were taken into account, with a minimal hit length of 60 bp,  
428 a maximum of 5 mismatches and no gap allowed. Ambiguous matches with the same best score  
429 were removed (parameters: glint mappe --mate-maxdist 10000 -C 0 --output-format bed --best-  
430 score --no-gap --step 2 --lmin 60 --mmis 5).

431 Differential expression analysis was performed with R (v3.6.2) using the EdgeR package  
432 (v3.28.1) and normalization with the TMM method (trimmed mean of M-values, Robinson and  
433 Oshlack, 2010) as described (Pecrix et al., 2018). Genes with no count across all libraries were  
434 not retained for further analysis. Differentially-expressed genes (DEGs) were called using the  
435 GLM likelihood ratio test, with a FDR adjusted q-value < 0.001. For quality control, plots of  
436 normalized datasets, heatmap on sample-to-sample Euclidean distances were generated with  
437 the package pheatmap version 1.0.8. Enrichment analysis used the MAPMAN software  
438 ([http://bar.utoronto.ca/ntools/cgi-bin/ntools\\_classification\\_superviewer.cgi](http://bar.utoronto.ca/ntools/cgi-bin/ntools_classification_superviewer.cgi)).

439

#### 440 **Statistical Analyses**

441 All indications about statistical analyses are indicated in Figure legends.

#### 442 **Visualization of $\beta$ -glucuronidase activity *in planta***

443 Plant tissues were vacuum-infiltrated in 50 mM sodium phosphate buffer, pH 7.2, 1 mM 5-  
444 bromo-4-chloro-3-indolyl  $\beta$ -D-glucuronide, 0.2% Triton X-100 [v/v], 2 mM potassium  
445 ferricyanide [K<sub>3</sub>FeCN<sub>6</sub>], 2 mM potassium ferrocyanide [K<sub>4</sub>FeCN<sub>6</sub>] and incubated from 2 to 12

446 hours at 37°C. Samples were clarified by successive incubations of 80% ethanol at 60°C for  
447 few hours and maintained in same solution at room temperature for several days.

448

#### 449 **Confocal imaging**

450 Leaves from eight-week-old plants grown in short day condition were fixed in 4%  
451 paraformaldehyde under a vacuum for 1h and cleared in Clearsee (10% xylitol, 25% urea, 15%  
452 deoxycholate) (Kurihara et al., 2015) and calcofluor (0.1%). Confocal imaging was performed  
453 on a Leica SP5 inverted microscope (Leica Microsystems, Wetzlar, Germany) using a Leica  
454 40x HCX PL APO CS lens. Calcofluor was excited at 405nm and visualized between 410-  
455 450nm. GFP and YFP were excited at 488nm and 514nm and visualized between 518-554nm  
456 and 518-543 nm respectively. Max intensity projections along the Z axis were made using  
457 ImageJ and FigureJ (Mutterer and Zinck, 2013) was used to assemble the figure.

458

#### 459 **Binary vectors and plant transformation**

460 For promoter expression analyses, ca. 2-kb promoter region was amplified by PCR from  
461 *Arabidopsis* Col-0 genomic DNA with Gateway-compatible oligonucleotides (Supplementary  
462 Table S5), cloned into the Gateway donor vector pDON207 by BP reaction (Invitrogen) and  
463 sequenced. Resulting ENTRY clones were recombined by LR recombination into pKGWFS7  
464 binary vector (Karimi et al., 2002) yielding a construct with the promoter driving the  
465 transcription of the GFP:GUS translational fusion. Plants were transformed as described  
466 (Chung et al., 2000).

#### 467 **Metabolomic analyses**

468 Samples were collected on four-week-old plants. The day before sample harvest, at the end of  
469 the light period, for each fully developed leaf, the 0.5 to 1mm leaf margin was removed with a

470 scissor on one half of the leaf when the other half was left intact. The plants were watered and  
471 covered to keep them at 100% relative humidity. Guttation droplets and pre-hydathode xylem  
472 sap were harvested at the end of the night period from intact and excised leaf margins,  
473 respectively. Xylem fluid was then collected on petiole after leaf removal after 3h in the dark  
474 and 100% relative humidity. About 500, 100 and 100 $\mu$ l of lyophilized fluid were used for  
475 metabolome analysis of guttation fluid, pre-hydathode xylem sap and xylem sap before leaf,  
476 respectively. These samples were extracted, derivatized and analyzed by an Agilent 7890A gas  
477 chromatograph coupled to an Agilent 5975C mass spectrometer as described (Fiehn, 2006;  
478 Masclaux-Daubresse et al., 2014). Data were analyzed with AMDIS ([http://chemdata.nist.gov/  
479 mass-spc/amdis/](http://chemdata.nist.gov/mass-spc/amdis/)) and QuanLynx software (Waters).  
480 Colorimetric nitrate and inorganic phosphate (molybdenum blue method) contents were  
481 determined as described (Kanno et al., 2016; Zhao and Wang, 2017).  
482 For hormone measurements, each sample of hydathodes and leaf blade were harvested with a  
483 1.5mm Miltex® biopsy Punch. Six mg of dry powder were extracted with 0.8 mL of  
484 acetone/water/acetic acid (80/19/1 v:v:v). Abscisic acid, salicylic acid, jasmonic acid, indole-  
485 3-acetic acid and cytokinins stable labeled isotopes used as internal standards were prepared as  
486 described (Le Roux et al., 2014). One ng of each and 0.5ng cytokinins standard was added to  
487 the sample. The extract was vigorously shaken for 1min, sonicated for 1 min at 25 Hz, shaken  
488 for 10 minutes at 10°C in a Thermomixer (Eppendorf®) and then centrifuged (8,000g, 10 °C,  
489 10 min.). The supernatants were collected and the pellets were re-extracted twice with 0.4 mL  
490 of the same extraction solution, vigorously shaken (1 min) and sonicated (1 min; 25 Hz). After  
491 the centrifugations, the three supernatants were pooled and dried (Final Volume 1.6 mL). Each  
492 dry extract was dissolved in 100  $\mu$ L of acetonitrile/water (50/50 v/v), filtered and analyzed  
493 using a Waters Acquity ultra performance liquid chromatography coupled to a Waters Xevo

494 Triple quadrupole mass spectrometer TQS (UPLC-ESI-MS/MS) as described (Le Roux et al.,  
495 2014).

496

#### 497 **Acknowledgements**

498 This work was supported by a grant from the Agence Nationale de la Recherche NEPHRON  
499 project (ANR-18-CE20-0020-01) to JMR, CB, GC, SCI, CR, MC, LF, SCH, DV, MFJ, SCA,  
500 LNU, PL, NLE, LNA and LDN. This study is set within the framework of the ‘Laboratoires  
501 d’Excellences’ (LABEX) TULIP (ANR-10-LABX-41) and of the ‘Ecole Universitaire de  
502 Recherche’ (EUR) TULIP-GS (ANR-18-EURE-0019). The IJPB benefits from the support of  
503 Saclay Plant Sciences-SPS (ANR-17-EUR-0007). This work has benefited from the support of  
504 IJPB's Plant Observatory technological platforms. We thank Guillaume Pilot for the gift of the  
505 *pGDU4-1:GUS* reporter line (Virginia Tech, Blacksburg, VA 24061, USA).

506

#### 507 **Author contributions**

508 JMR, LNU, PL, NLE, LNA, MS and LDN conceived the study and supervised experiments.  
509 JMR, CB, GC, SCI, CR, MC, LF, DV, SCH and NLE performed and analyzed the experiments.  
510 CB, MFJ, SCA and JMR processed and analyzed transcriptomic data; JMR and LDN drafted  
511 the manuscript. All authors critically reviewed the results and the manuscript.

512

#### 513 **Data availability statement**

514 All relevant data are within the manuscript and its Supporting Information files. RNA  
515 sequencing results are available in the single read archive SRP322413 (SRX11051786,  
516 SRX11051788-9 and SRX11051791-5).

517 **Competing interests:** The authors have declared that no competing interests exist.

## Tables

**Table 1:** List of the 20 most differentially expressed genes (DEG) in mature Arabidopsis hydathodes relative to the leaf blade (Extracted from Supplemental Table S3).

| AGI <sup>a</sup> | Gene name     | log <sub>2</sub> FC <sup>b</sup> | MNC hydathode <sup>c</sup> | MNC leaf blade <sup>c</sup> | FDR <sup>d</sup>     | TAIR annotation <sup>e</sup>                                         |
|------------------|---------------|----------------------------------|----------------------------|-----------------------------|----------------------|----------------------------------------------------------------------|
| At3g16670        |               | 11                               | 997.6                      | 0.8                         | 2.10 <sup>-16</sup>  | Pollen Ole e 1 allergen and extensin family protein                  |
| At3g05730        |               | 10,8                             | 1434                       | 4.6                         | 7.10 <sup>-10</sup>  | Defensin like                                                        |
| At3g16660        |               | 8,7                              | 191                        | 1.1                         | 4.10 <sup>-12</sup>  | Pollen Ole e 1 allergen and extensin family protein                  |
| At1g56710        | <i>PGL1</i>   | 7,1                              | 37.2                       | 0.2                         | 3.10 <sup>-72</sup>  | PGL1__Pectin lyase-like superfamily protein                          |
| At3g09330        | <i>NIP3;1</i> | 6,7                              | 12.6                       | 0.1                         | 4.10 <sup>-78</sup>  | Transmembrane amino acid transporter family protein                  |
| At1g22900        |               | 6,7                              | 65.6                       | 0.6                         | 5.10 <sup>-174</sup> | Disease resistance-responsive (dirigent-like protein) family protein |
| At1g08090        | <i>NRT2.1</i> | 6,6                              | 58.9                       | 0.7                         | 10 <sup>-36</sup>    | NRT2.1__nitrate transporter 2:1                                      |
| At4g36260        | <i>STY2</i>   | 6,2                              | 23.4                       | 0.3                         | 2.10 <sup>-63</sup>  | SRS2_STY2__Lateral root primordium (LRP) protein-related             |
| At2g28970        |               | 6,1                              | 5.1                        | 0.1                         | 4.10 <sup>-36</sup>  | Leucine-rich repeat protein kinase family protein                    |
| At3g51060        | <i>STY1</i>   | 5,9                              | 6.9                        | 0.1                         | 2.10 <sup>-43</sup>  | AtSTY1_SRS1_STY1__Lateral root primordium (LRP) protein-related      |
| At4g32950        |               | 5,7                              | 9.8                        | 0.1                         | 2.10 <sup>-49</sup>  | Protein phosphatase 2C family protein                                |
| At2g43610        |               | 5,7                              | 7.9                        | 0.1                         | 6.10 <sup>-51</sup>  | Chitinase family protein                                             |
| At1g17960        |               | 5,6                              | 4.1                        | 0.1                         | 2.10 <sup>-28</sup>  | Threonyl-tRNA synthetase                                             |
| At2g29380        | <i>HAI3</i>   | 5,4                              | 3.3                        | 0.1                         | 7.10 <sup>-22</sup>  | HAI3__highly ABA-induced PP2C gene 3                                 |

|           |                 |     |      |     |              |                                                                        |
|-----------|-----------------|-----|------|-----|--------------|------------------------------------------------------------------------|
| At4g23550 | <i>WRKY29</i>   | 5,1 | 60.6 | 1.6 | $2.10^{-81}$ | ATWRKY29_WRKY29__WRKY family transcription factor                      |
| At2g19990 |                 | 5,1 | 20.4 | 0.5 | $2.10^{-72}$ | PR-1-LIKE__pathogenesis-related protein-1-like                         |
| At5g11320 | <i>YUC4</i>     | 5   | 2.7  | 0.1 | $2.10^{-20}$ | AtYUC4_YUC4__Flavin-binding monooxygenase family protein               |
| At5g24910 | <i>CYP714A1</i> | 5   | 6    | 0.2 | $1.10^{-28}$ | CYP714A1_ELA1__cytochrome P450, family 714, subfamily A, polypeptide 1 |
| At5g43890 | <i>YUC5</i>     | 5   | 6.7  | 0.2 | $5.10^{-30}$ | SUPER1_YUC5__Flavin-binding monooxygenase family protein               |
| At4g09430 |                 | 4,8 | 3.9  | 0.2 | $2.10^{-22}$ | Disease resistance protein (TIR-NBS-LRR class) family                  |

<sup>a</sup> Arabidopsis genome gene ID.

<sup>b</sup> log<sub>2</sub> fold change hydathode versus leaf blade

<sup>c</sup> Mean normalized counts in hydathodes or leaf blade

<sup>d</sup> False discovery rate.

<sup>e</sup> Gene annotation in TAIR10 version of the Arabidopsis genome.



**Table 2:** List of the genes encoding transporters which are overexpressed in mature Arabidopsis hydathodes relative to the leaf blade (Extracted from Supplemental Table S3).

| Transported compounds      | Number of genes | Gene names ( $\log_2FC^a$ )                                                                                                                       |
|----------------------------|-----------------|---------------------------------------------------------------------------------------------------------------------------------------------------|
| <b>Inorganic compounds</b> |                 |                                                                                                                                                   |
| Nitrate                    | 7               | <i>NRT1.1</i> (0.8), <i>NRT1.7</i> (1.4), <i>NRT2.1</i> (6.6), <i>NRT2.5</i> (2.6), <i>NRT2.6</i> (2.7), <i>NRT3.1</i> (1.5), <i>NPF3.1</i> (2.2) |
| Potassium                  | 4               | <i>KC1</i> (2.8), <i>KAT2</i> (1.3), <i>GORK</i> (1.3), <i>AKT1</i> (1.1)                                                                         |
| Water                      | 3               | <i>PIP2;2</i> (0.6), <i>PIP2;3</i> (1.2), <i>PIP2;5</i> (1.0)                                                                                     |
| Zinc                       | 3               | <i>ZIF1</i> (0.7), <i>ZIP5</i> (1.1), <i>ZIP7</i> (1.7)?                                                                                          |
| sulfate                    | 2               | <i>SULT1;2</i> (2.7), <i>SULT3;2</i> (2.6)                                                                                                        |
| Boron                      | 2               | <i>NIP5;1</i> (1.9), <i>BOR5</i> (1.1)?                                                                                                           |
| Calcium                    | 2               | <i>CCX1</i> (1.6), <i>CCX2</i> (0.8)                                                                                                              |
| Iron                       | 2               | <i>ZIF1</i> (0.7), <i>FRO2</i> (1.4)                                                                                                              |
| Arsenite                   | 1               | <i>NIP3;1</i> (4.6)                                                                                                                               |
| Chloride                   | 1               | <i>NPF2.5</i> (2.5)                                                                                                                               |
| Copper                     | 1               | <i>ZIP2</i> (3.7)                                                                                                                                 |
| Inorganic phosphate        | 1               | <i>PHT1;4</i> (4.3)                                                                                                                               |
| <b>Organic compounds</b>   |                 |                                                                                                                                                   |
| Peptides                   | 6               | <i>GGCT2;1</i> (1.6), <i>GGCT2;2</i> (0.6), <i>ABCC12</i> (1.2), <i>OPT1</i> (2.9), <i>YSL1</i> (2.2), <i>YSL7</i> (3.2)                          |
| Wax                        | 5               | <i>LTP2</i> (1.8), <i>LTP3</i> (1.4), <i>ABCG1</i> (1.9), <i>ABCG5</i> (1.0), <i>ABCG15</i> (2.6)                                                 |

|                         |   |                                                                                                                                        |
|-------------------------|---|----------------------------------------------------------------------------------------------------------------------------------------|
| Sugars                  | 3 | <i>AtSUC1</i> (1.3), <i>At3g05400</i> (3.8), <i>At1g05030</i> (1.4)                                                                    |
| Amino acids             | 2 | <i>At3g09330</i> (6.7)?, <i>At1g08230</i> (0.7)?                                                                                       |
| ABA, GA                 | 1 | <i>PTR3</i> (1.7)                                                                                                                      |
| Auxin                   | 1 | <i>ABCB14</i> (2.1)                                                                                                                    |
| Glucosinolates          | 1 | <i>AtNPF2.11</i> (1.5)                                                                                                                 |
| Proline, GABA           | 1 | <i>PROT3</i> (2.1)                                                                                                                     |
| Pyridoxin               | 1 | <i>PUPI</i> (1.2)                                                                                                                      |
| Camalexin               | 1 | <i>ABCG34</i> (1.0)                                                                                                                    |
| Urea                    | 1 | <i>TIP4;1</i> (2.4)                                                                                                                    |
| Nucleosides             | 1 | <i>ATENT3</i> (1.2)                                                                                                                    |
| Nucleotides/sugars      | 1 | <i>At5g57100</i> (0.9)?                                                                                                                |
| Glutathion-conjugates   | 1 | <i>ABCC3</i> (1.3)                                                                                                                     |
| Organic cation/carnitin | 1 | <i>AtOCT4</i> (1.0)?                                                                                                                   |
| Mobil signal            | 1 | <i>bige1b</i> (3.8)                                                                                                                    |
| Polyols                 | 1 | <i>ATPMT5</i> (1.0)                                                                                                                    |
| Unknown                 | 6 | <i>At5g52860</i> (4.8), <i>At2g21020</i> (4.1), <i>At5g17700</i> (2.7), <i>At3g21080</i> (2.3), <i>ABCG27</i> (1.0), <i>AAC2</i> (0.8) |

---

<sup>a</sup> log<sub>2</sub> fold change hydathode versus leaf blade

**Table 3:** List of the defense-related 20 most differentially expressed genes (DEG) in mature Arabidopsis hydathodes relative to the leaf blade (Extracted from Supplemental Table S3).

| AGI <sup>a</sup> | Gene name       | log <sub>2</sub> FC <sup>b</sup> | MNC hydathode <sup>c</sup> | MNC leaf blade <sup>c</sup> | FDR <sup>d</sup>     | TAIR annotation <sup>e</sup>                                         |
|------------------|-----------------|----------------------------------|----------------------------|-----------------------------|----------------------|----------------------------------------------------------------------|
| At3g05730        |                 | 10.8                             | 1434                       | 4.6                         | 7.10 <sup>-10</sup>  | Defensin?                                                            |
| At1g22900        |                 | 6.7                              | 65.6                       | 0.6                         | 5.10 <sup>-174</sup> | Disease resistance-responsive (dirigent-like protein) family protein |
| At2g43610        |                 | 5.7                              | 7.9                        | 0.1                         | 6.10 <sup>-51</sup>  | Chitinase family protein                                             |
| At2g19990        | <i>PRI-LIKE</i> | 5.1                              | 20.4                       | 0.5                         | 2.10 <sup>-72</sup>  | PR-1-LIKE__pathogenesis-related protein-1-like                       |
| At4g09430        |                 | 4.8                              | 3.9                        | 0.2                         | 2.10 <sup>-22</sup>  | Disease resistance protein (TIR-NBS-LRR class) family                |
| At1g72260        | <i>THI2.1</i>   | 4.6                              | 21.5                       | 1.6                         | 6.10 <sup>-09</sup>  | THI2.1_THI2.1.1__thionin 2.1                                         |
| At1g44160        |                 | 4.5                              | 5.4                        | 0.2                         | 3.10 <sup>-26</sup>  | HSP40/DnaJ peptide-binding protein                                   |
| At2g43590        |                 | 4.4                              | 43.9                       | 2.4                         | 2.10 <sup>-96</sup>  | Chitinase family protein                                             |
| At2g17060        |                 | 4.4                              | 4.7                        | 0.2                         | 3.10 <sup>-27</sup>  | Disease resistance protein (TIR-NBS-LRR class) family                |
| At1g19610        | <i>PDF1.4</i>   | 4                                | 17.3                       | 1                           | 9.10 <sup>-45</sup>  | LCR78_PDF1.4__Arabidopsis defensin-like protein                      |
| At1g23120        |                 | 3.2                              | 4.6                        | 0.4                         | 10 <sup>-10</sup>    | Polyketide cyclase/dehydrase and lipid transport superfamily protein |
| At2g17050        |                 | 3.2                              | 4.1                        | 0.4                         | 10 <sup>-10</sup>    | disease resistance protein (TIR-NBS-LRR class), putative             |
| At1g70880        |                 | 3                                | 0.9                        | 0.1                         | 3.10 <sup>-06</sup>  | Polyketide cyclase/dehydrase and lipid transport superfamily protein |
| At4g19820        |                 | 2.9                              | 2                          | 0.2                         | 4.10 <sup>-08</sup>  | Glycosyl hydrolase family protein with chitinase insertion domain    |
| At2g43620        |                 | 2.7                              | 36.9                       | 5.5                         | 3.10 <sup>-56</sup>  | Chitinase family protein                                             |
| At2g17055        |                 | 2.6                              | 0.6                        | 0.1                         | 10 <sup>-04</sup>    | Toll-Interleukin-Resistance (TIR) domain family protein              |

|           |              |     |     |     |              |                                                                         |
|-----------|--------------|-----|-----|-----|--------------|-------------------------------------------------------------------------|
| At4g19810 | <i>ChiC</i>  | 2.6 | 8.5 | 1.5 | $4.10^{-13}$ | ChiC__Glycosyl hydrolase family protein with chitinase insertion domain |
| At4g09420 |              | 2.5 | 7.5 | 1.2 | $9.10^{-15}$ | Disease resistance protein (TIR-NBS class)                              |
| At2g21510 |              | 2.3 | 5.4 | 1.2 | $5.10^{-07}$ | DNAJ heat shock N-terminal domain-containing protein                    |
| At5g47130 | <i>BAX-1</i> | 2.2 | 9.4 | 1.9 | $10^{-12}$   | Bax inhibitor-1 family protein                                          |

<sup>a</sup> Arabidopsis genome gene ID.

<sup>b</sup> log<sub>2</sub> fold change hydathode versus leaf blade

<sup>c</sup> Mean normalized counts in hydathodes or leaf blade

<sup>d</sup> False discovery rate.

<sup>e</sup> Gene annotation in TAIR10 version of the Arabidopsis genome.

**Table 4:** List of the genes involved in hormone metabolism which are differentially expressed in mature Arabidopsis hydathodes relative to the leaf blade (Extracted from Supplemental Table S3, refer to Figure 3 for auxin).

| AGI <sup>a</sup>     | Gene name      | log <sub>2</sub> FC <sup>b</sup> | MNC hydathode <sup>c</sup> | MNC leaf blade <sup>c</sup> | FDR <sup>d</sup>    | TAIR annotation <sup>e</sup>                                                             |
|----------------------|----------------|----------------------------------|----------------------------|-----------------------------|---------------------|------------------------------------------------------------------------------------------|
| <b>Absissic acid</b> |                |                                  |                            |                             |                     |                                                                                          |
| At1g30100            | <i>NCED5</i>   | 2.7                              | 0.9                        | 0.2                         | 3.10 <sup>-05</sup> | ATNCED5_NCED5__nine-cis-epoxycarotenoid dioxygenase 5                                    |
| At5g15960            | <i>KIN1</i>    | 2.2                              | 438.8                      | 101.5                       | 10 <sup>-29</sup>   | KIN1__stress-responsive protein (KIN1) / stress-induced protein (KIN1)                   |
| At4g24960            | <i>HVA22D</i>  | 0.8                              | 139.1                      | 79.9                        | 3.10 <sup>-05</sup> | ATHVA22D_HVA22D__HVA22 homologue D                                                       |
| At5g67030            | <i>ABA1</i>    | -0.8                             | 278.7                      | 467.4                       | 6.10 <sup>-04</sup> | ABA1_ATABA1_ATZEP_IBS3_LOS6_NPQ2_ZEP__zeaxanthin epoxidase (ZEP) (ABA1)                  |
| <b>Cytokinins</b>    |                |                                  |                            |                             |                     |                                                                                          |
| At1g22400            | <i>UGT85A1</i> | 1.8                              | 33.5                       | 9.4                         | 3.10 <sup>-09</sup> | ATUGT85A1_UGT85A1__UDP-Glycosyltransferase superfamily protein                           |
| At3g63110            | <i>IPT3</i>    | -1.1                             | 3.3                        | 7                           | 2.10 <sup>-04</sup> | ATIPT3_IPT3__isopentenyltransferase 3                                                    |
| <b>Gibberellins</b>  |                |                                  |                            |                             |                     |                                                                                          |
| At1g02400            | <i>GA2OX6</i>  | 1.6                              | 79.1                       | 24.9                        | 10 <sup>-11</sup>   | ATGA2OX4_ATGA2OX6_DTA1_GA2OX6__gibberellin 2-oxidase 6                                   |
| At5g14920            | <i>GASA14</i>  | 1.3                              | 43.1                       | 17.4                        | 10 <sup>-09</sup>   | GASA14__Gibberellin-regulated family protein                                             |
| At5g17490            | <i>RGL3</i>    | 1.1                              | 33.6                       | 18.1                        | 2.10 <sup>-04</sup> | AtRGL3_RGL3__RGA-like protein 3                                                          |
| At3g63010            | <i>GID18</i>   | 0.8                              | 21.3                       | 13.2                        | 5.10 <sup>-04</sup> | ATGID1B_GID1B__alpha/beta-Hydrolases superfamily protein                                 |
| At1g79460            | <i>KSI</i>     | -0.8                             | 21.6                       | 36.4                        | 3.10 <sup>-06</sup> | ATKS_ATKS1_GA2_KS_KS1__Terpenoid cyclases/Protein prenyltransferases superfamily protein |

|                       |               |      |      |       |                     |                                                                                      |
|-----------------------|---------------|------|------|-------|---------------------|--------------------------------------------------------------------------------------|
| At1g22690             |               | -1.1 | 5.2  | 11.2  | 2.10 <sup>-06</sup> | Gibberellin-regulated family protein                                                 |
| At5g52020             | <i>GSTF11</i> | 3.1  | 4.6  | 0.5   | 3.10 <sup>-14</sup> | Integrase-type DNA-binding superfamily protein                                       |
| <b>Salicylic Acid</b> |               |      |      |       |                     |                                                                                      |
| At1g74710             | <i>ICS1</i>   | -1.3 | 19.7 | 49.9  | 2.10 <sup>-05</sup> | ATICS1_EDS16_ICS1_SID2__ADC synthase superfamily protein                             |
| At1g18870             | <i>ICS2</i>   | -1.2 | 8.6  | 18.7  | 2.10 <sup>-04</sup> | ATICS2_ICS2__isochorismate synthase 2                                                |
| At5g24530             | <i>DRM6</i>   | -0.8 | 73.5 | 128.4 | 10 <sup>-04</sup>   | AtDMR6_DMR6__2-oxoglutarate (2OG) and Fe(II)-dependent oxygenase superfamily protein |
| At4g37750             | <i>ANT</i>    | -1.2 | 1.7  | 3.9   | 3.10 <sup>-04</sup> | ANT_AtANT_CKC_CKC1_DRG__Integrase-type DNA-binding superfamily protein               |
| At5g13320             | <i>GH3.12</i> | -1.6 | 8.7  | 27.9  | 8.10 <sup>-04</sup> | AtGH3.12_GDG1_GH3.12_PBS3_WIN3__auxin-responsive GH3 family protein                  |
| <b>Jasmonic Acid</b>  |               |      |      |       |                     |                                                                                      |
| At1g55020             | <i>LOX1</i>   | -0.9 | 12.4 | 22.1  | 7.10 <sup>-06</sup> | ATLOX1_LOX1__lipoxygenase 1                                                          |
| At3g22400             | <i>LOX5</i>   | -1.2 | 2.9  | 6.7   | 5.10 <sup>-04</sup> | ATLOX5_LOX5__PLAT/LH2 domain-containing lipoxygenase family protein                  |

<sup>a</sup> Arabidopsis genome gene ID.

<sup>b</sup> log<sub>2</sub> fold change hydathode versus leaf blade

<sup>c</sup> Mean normalized counts in hydathodes or leaf blade

<sup>d</sup> False discovery rate.

<sup>e</sup> Gene annotation in TAIR10 version of the Arabidopsis genome.

## Figure legends

**Figure 1:** Transcriptomic analysis of hydathode-enriched versus leaf blade samples identifies 1460 differentially-expressed genes (DEG, FDR<0.001) in mature *Arabidopsis* leaves. (A) Leaf teeth (hydathode-enriched) and leaf blade samples were macro-dissected from nine- to ten-week-old plant leaves and subjected to RNA sequencing. (B) Functional categorization of the 1087 genes differentially-expressed genes with a functional annotation. DEG were mainly annotated using the MapMan analysis classification available from the BAR site ([https://bar.utoronto.ca/ntools/cgi-bin/ntools\\_classification\\_superviewer.cgi](https://bar.utoronto.ca/ntools/cgi-bin/ntools_classification_superviewer.cgi)) and expert annotation extracted from literature (Supplemental Table S3). A color key is proportional to the mean log<sub>2</sub> Fold Change (log<sub>2</sub>FC) of the genes belonging to the given functional category that were globally either more expressed in hydathodes (in red) or in the leaf blade (in blue).

**Figure 2:** Detection of GUS activity (blue) in leaves of eight-week-old transgenic plants carrying promoter:*GUS* reporter fusions for *Pollen Ole e 1* (*At3g16670*), *Defensin-like* (*At3g05730*), *Lipid transfer protein* (*At1g62510*) and *Pectin lyase-like family PGL1* (*At1g56710*). Scale bars = 2 mm (Left panels), 200 μm (Right panels).

**Figure 3:** Hydathodes are important organs for auxin metabolism and accumulation in mature *Arabidopsis* leaves. (A) Boxplot representation of concentrations of free indole-acetic acid (IAA) in leaf blade (Blade) and hydathodes (Hyda) of eight-week-old plants were determined by GC-MS. (B) Expression ratio (Hydathodes vs. leaf blade) of differentially-expressed genes (DEG, Table S3) important for auxin biology, including biosynthetic genes and their regulators, transporter genes and their regulators as well as their downstream signaling components and

auxin-responsive genes. Genes more expressed in hydathodes are shown in red, those more expressed in leaf blade in blue. Numbers refer to mean  $\log_2$  fold change ( $\log_2FC$ ). (C) Boxplot representation of concentrations of auxin conjugate precursor oxindole-3-acetic acid in leaf blade (Blade) and hydathodes (Hyda) of eight-week-old plants were determined by GC-MS. Statistically significant differences were determined using a paired *t*-test (\*\*,  $p < 0.01$ ; \*\*\*,  $p < 0.001$ ). *n*= number of biological replicates.

**Figure 4:** Metabolomic analysis of fluids collected at the petiole (P), before hydathodes (BH) or at the leaf margin (guttation fluid, GF) of leaves from four-week-old plants. (A, B) Concentrations of 52 metabolites were determined by GC-MS in P, BH and G fluids (Table S4). (A) Boxplot representation of total metabolite concentrations in the three types of samples. (B) Box plot representation of 23 out of the 52 metabolites which are in significantly lower concentrations in the guttation fluid (GF) compared to the fluids sampled before hydathodes (BH). Statistically significant differences were determined using non-parametric Kruskal-Wallis test ( $p < 0.05$ ). (C) Boxplot representation of nitrate concentrations in P, BH and G fluids. (D) Boxplot representation of inorganic phosphate concentrations in P, BH and G fluids. (E) Boxplot representation of mineral elements concentrations in P, BH and G fluids measured with ICP-MS. (C,D) Statistically significant differences were determined using a paired *t*-test (\*,  $p < 0.05$ ; \*\*,  $p < 0.01$ ). *n*= number of biological replicates.

**Figure 5:** NRT2.1 nitrate and PHT1;4 phosphate transporters are important to capture nitrate and phosphate in hydathodes, respectively. Boxplot representations of nitrate (A) and inorganic phosphate (B) concentrations measured in guttation fluids of four-week-old *nrt2.1* (N859604) and *pht1;4-1* mutants relative to their wild-type controls Col-0 and Ws-4, respectively.



Statistically significant differences were determined using a paired *t*-test (\*,  $p < 0.05$ ; \*\*\*,  $p < 0.001$ ). *n* = number of biological replicates.

**Figure 6:** Boxplot representation of plant hormones concentrations in leaf blade (Blade) and hydathodes (Hyda) of eight-week-old plants as measured by GC-MS: abscisic acid (ABA), salicylic acid (SA), jasmonic acid (JA) and cytokinins (zeatin-7- $\beta$ -D-glucoside (Z7G), trans-zeatin-o-glucoside riboside (ZROG), zeatin-o-glucoside (ZOG), zeatin-9- $\beta$ -D-glucoside (Z9G). Statistically significant differences were determined using a paired *t*-test (\*,  $p < 0.05$ ; \*\*\*,  $p < 0.001$ ). *n* = number of biological replicates.

### Supplemental Figures and Tables

**Table S1:** Comparison of gene expression in hydathodes vs leaf blade obtained from promoter:*GUS* fusions and this transcriptomic analysis

**Table S2:** RNA sequencing results for libraries made from hydathodes and leaf blade tissues sampled on mature leaves of Arabidopsis accession Col-0.

**Table S3:** Expression data and properties of all genes in hydathodes versus leaf blade in mature Arabidopsis leaves from accession Col-0.

**Table S4:** Concentration of 52 metabolites in fluids collected at the petiole (P), before hydathodes (BH) or at the margin (guttation fluid, GF) of leaves from four-week-old Arabidopsis plants were measured with GC-MS.

**Table S5:** Name and sequence of oligonucleotides used in this study.

**Figure S1:** Transcriptomic analysis of Arabidopsis hydathode-enriched versus leaf blade samples (A) Analysis of euclidean distances between global expression profiles in the four biological replicates per condition cluster samples per tissue. A color key is shown on the right. (B) Volcano plot of gene expression levels ( $\log_2$  fold change (FC)) in hydathodes versus leaf blade and false discovery rate ( $\log_{10}$ FDR). Genes with an FDR below 0.001 and absolute value ( $\log_2$ FC) higher than 1 are indicated in blue and red when overexpressed in the hydathodes and leaf blade samples, respectively. (C) Functional categories significantly over- or under-represented in hydathodes (red) and leaf blade (blue) using a MapMan classification. Analysis was applied to the annotated DEG (FDR<0.001). Normed frequency number indicates the proportion of DEG in the functional category (raw numbers are indicated; [http://bar.utoronto.ca/ntools/cgi-bin/ntools\\_classification\\_superviewer.cgi](http://bar.utoronto.ca/ntools/cgi-bin/ntools_classification_superviewer.cgi)).

**Figure S2:** Visualization of promoter activities in leaves of four- and eight-week-old transgenic Arabidopsis plants carrying promoter:*GUS* reporter fusions. *TAA1* and *YUCs* genes are involved in auxin synthesis. The *DR5* synthetic promoter is a reporter of auxin response. *PHT1;4* (studied using a promoter trap mutant) and *GDU4.7* encode phosphate and glutamate transporters, respectively. Expression fold change ( $\log_2$ FC) between hydathodes versus leaf blade is indicated as described (Table S3). Scale bar= 200 $\mu$ m.

**Figure S3:** Observation of the most distal or fourth most distal hydathode on a mature leaf of an eight-week-old plant by confocal microscopy in the *DR5:VENUS* auxin signaling reporter line (Yellow) and the *E325:GFP* enhancer trap line (Green). Bright field and bright field+ fluorescence overlay images are shown. Scale bars= 100 $\mu$ m.

**Figure S4:** Genes involved in phenylpropanoid metabolism are relatively less expressed in mature hydathodes relative to the leaf blade. (A) DEG involved in the biosynthesis of lignins and flavonoids and their regulators. Numbers indicate their  $\log_2$  fold change as described (Table

S3). (B) Lignin staining of a *Arabidopsis* hydathode from an eight-week-old plant using phloroglucinol. Lignified secondary cell wall of xylem vessels (visualized in pink with phloroglucinol staining) is restricted to the lower portion of hydathodes and the vascular elements. Scale bar= 200µm.

## References

- Aloni R** (2013) Role of hormones in controlling vascular differentiation and the mechanism of lateral root initiation. *Planta* **238**: 819-830
- Aloni R, Schwalm K, Langhans M, Ullrich CI** (2003) Gradual shifts in sites of free-auxin production during leaf-primordium development and their role in vascular differentiation and leaf morphogenesis in *Arabidopsis*. *Planta* **216**: 841-853
- Alvarez JP, Goldshmidt A, Efroni I, Bowman JL, Eshed Y** (2009) The *NGATHA* distal organ development genes are essential for style specification in *Arabidopsis*. *Plant Cell* **21**: 1373-1393
- Ascencio-Ibanez JT, Sozzani R, Lee TJ, Chu TM, Wolfinger RD, Cella R, Hanley-Bowdoin L** (2008) Global analysis of *Arabidopsis* gene expression uncovers a complex array of changes impacting pathogen response and cell cycle during geminivirus infection. *Plant Physiol* **148**: 436-454
- Awai K, Marechal E, Block MA, Brun D, Masuda T, Shimada H, Takamiya K, Ohta H, Joyard J** (2001) Two types of MGDG synthase genes, found widely in both 16:3 and 18:3 plants, differentially mediate galactolipid syntheses in photosynthetic and nonphotosynthetic tissues in *Arabidopsis thaliana*. *Proc Natl Acad Sci U S A* **98**: 10960-10965
- Bailey KJ, Leegood RC** (2016) Nitrogen recycling from the xylem in rice leaves: dependence upon metabolism and associated changes in xylem hydraulics. *J Exp Bot* **67**: 2901-2911
- Barbosa ICR, Hammes UZ, Schwechheimer C** (2018) Activation and Polarity Control of PIN-FORMED Auxin Transporters by Phosphorylation. *Trends Plant Sci* **23**: 523-538
- Bellenot C, Routaboul JM, Laufs P, Noël LD** (2022) Hydathodes. *Curr Biol* **32**: R763-R764
- Benjamins R, Ampudia CS, Hooykaas PJ, Offringa R** (2003) PINOID-mediated signaling involves calcium-binding proteins. *Plant Physiol* **132**: 1623-1630

- Bernal E, Deblais L, Rajashekara G, Francis DM** (2021) Bioluminescent *Xanthomonas hortorum* pv. *gardneri* as a Tool to Quantify Bacteria in *Planta*, Screen Germplasm, and Identify Infection Routes on Leaf Surfaces. *Front Plant Sci* **12**: 667351
- Carlton WM, Braun EJ, Gleason ML** (1998) Ingress of *Clavibacter michiganensis* subsp. *michiganensis* into Tomato Leaves Through Hydathodes. *Phytopathology* **88**: 525-529
- Cerutti A, Jauneau A, Auriac M-C, Lauber E, Martinez Y, Chiarenza S, Leonhardt N, Berthome R, Noël LD** (2017) Immunity at Cauliflower Hydathodes Controls Systemic Infection by *Xanthomonas campestris* pv. *campestris*. *Plant Physiol* **174**: 700-716
- Cerutti A, Jauneau A, Laufs P, Leonhardt N, Schattat MH, Berthomé R, Routaboul JM, Noël LD** (2019) Mangroves in the Leaves: Anatomy, Physiology, and Immunity of Epithelial Hydathodes. *Annu Rev Phytopathol* **57**: 91-116
- Chen Q, Dai X, De-Paoli H, Cheng Y, Takebayashi Y, Kasahara H, Kamiya Y, Zhao Y** (2014) Auxin overproduction in shoots cannot rescue auxin deficiencies in Arabidopsis roots. *Plant Cell Physiol* **55**: 1072-1079
- Cheng Y, Dai X, Zhao Y** (2006) Auxin biosynthesis by the YUCCA flavin monooxygenases controls the formation of floral organs and vascular tissues in Arabidopsis. *Genes Dev* **20**: 1790-1799
- Cheng Y, Dai X, Zhao Y** (2007) Auxin synthesized by the YUCCA flavin monooxygenases is essential for embryogenesis and leaf formation in Arabidopsis. *Plant Cell* **19**: 2430-2439
- Chomczynski P** (1993) A reagent for the single-step simultaneous isolation of RNA, DNA and proteins from cell and tissue samples. *Biotechniques* **15**: 532-534, 536-537
- Chung MH, Chen MK, Pan SM** (2000) Floral spray transformation can efficiently generate Arabidopsis transgenic plants. *Transgenic Res* **9**: 471-476
- Coculo D, Lionetti V** (2022) The Plant Invertase/Pectin Methylesterase Inhibitor Superfamily. *Front Plant Sci* **13**: 863892
- Cui YN, Li XT, Yuan JZ, Wang FZ, Wang SM, Ma Q** (2019) Nitrate transporter NPF7.3/NRT1.5 plays an essential role in regulating phosphate deficiency responses in Arabidopsis. *Biochem Biophys Res Commun* **508**: 314-319
- Driouch A, Follet-Gueye ML, Bernard S, Kousar S, Chevalier L, Vicre-Gibouin M, Lerouxel O** (2012) Golgi-mediated synthesis and secretion of matrix polysaccharides of the primary cell wall of higher plants. *Front Plant Sci* **3**: 79
- Eklund DM, Thelander M, Landberg K, Staldal V, Nilsson A, Johansson M, Valsecchi I, Pederson ER, Kowalczyk M, Ljung K, Ronne H, Sundberg E** (2010) Homologues

- of the *Arabidopsis thaliana* *SHI/STY/LRP1* genes control auxin biosynthesis and affect growth and development in the moss *Physcomitrella patens*. *Development* **137**: 1275-1284
- Feild TS, Sage TL, Czerniak C, Iles WJD** (2005) Hydathodal leaf teeth of *Chloranthus japonicus* (*Chloranthaceae*) prevent guttation-induced flooding of the mesophyll. *Plant, Cell and Environment* **28**: 1179-1190
- Fiehn O** (2006) Metabolite profiling in *Arabidopsis*. *Methods Mol Biol* **323**: 439-447
- Filleur S, Dorbe MF, Cerezo M, Orsel M, Granier F, Gojon A, Daniel-Vedele F** (2001) An *Arabidopsis* T-DNA mutant affected in *Nrt2* genes is impaired in nitrate uptake. *FEBS Lett* **489**: 220-224
- Furutani M, Nakano Y, Tasaka M** (2014) MAB4-induced auxin sink generates local auxin gradients in *Arabidopsis* organ formation. *Proc Natl Acad Sci U S A* **111**: 1198-1203
- Galweiler L, Guan C, Muller A, Wisman E, Mendgen K, Yephremov A, Palme K** (1998) Regulation of polar auxin transport by AtPIN1 in *Arabidopsis* vascular tissue. *Science* **282**: 2226-2230
- Garcion C, Lohmann A, Lamodièrè E, Catinot J, Buchala A, Doermann P, Metraux JP** (2008) Characterization and biological function of the *ISOCHORISMATE SYNTHASE2* gene of *Arabidopsis*. *Plant Physiol* **147**: 1279-1287
- Ghorbani S, Hoogewijs K, Pecenkova T, Fernandez A, Inze A, Eeckhout D, Kawa D, De Jaeger G, Beeckman T, Madder A, Van Breusegem F, Hilson P** (2016) The SBT6.1 subtilase processes the GOLVEN1 peptide controlling cell elongation. *J Exp Bot* **67**: 4877-4887
- Gigolashvili T, Yatusевич R, Berger B, Muller C, Flugge UI** (2007) The R2R3-MYB transcription factor HAG1/MYB28 is a regulator of methionine-derived glucosinolate biosynthesis in *Arabidopsis thaliana*. *Plant J* **51**: 247-261
- Guilfoyle TJ, Hagen G** (2007) Auxin response factors. *Curr Opin Plant Biol* **10**: 453-460
- Hayashi KI, Arai K, Aoi Y, Tanaka Y, Hira H, Guo R, Hu Y, Ge C, Zhao Y, Kasahara H, Fukui K** (2021) The main oxidative inactivation pathway of the plant hormone auxin. *Nat Commun* **12**: 6752
- Hugouvieux V, Barber CE, Daniels MJ** (1998) Entry of *Xanthomonas campestris* pv. *campestris* into hydathodes of *Arabidopsis thaliana* leaves: a system for studying early infection events in bacterial pathogenesis. *Molecular plant-microbe interactions* **11**: 537-543

- Jauneau A, Cerutti A, Auriac MC, Noël LD** (2020) Anatomy of leaf apical hydathodes in four monocotyledon plants of economic and academic relevance. *PLoS One* **15**: e0232566
- Jiang Y, Liang G, Yang S, Yu D** (2014) Arabidopsis WRKY57 functions as a node of convergence for jasmonic acid- and auxin-mediated signaling in jasmonic acid-induced leaf senescence. *Plant Cell* **26**: 230-245
- Jin SH, Ma XM, Kojima M, Sakakibara H, Wang YW, Hou BK** (2013) Overexpression of glucosyltransferase UGT85A1 influences trans-zeatin homeostasis and trans-zeatin responses likely through O-glucosylation. *Planta* **237**: 991-999
- Kaneda M, Schuetz M, Lin BS, Chanis C, Hamberger B, Western TL, Ehlting J, Samuels AL** (2011) ABC transporters coordinately expressed during lignification of Arabidopsis stems include a set of ABCBs associated with auxin transport. *J Exp Bot* **62**: 2063-2077
- Kanno S, Cuyas L, Javot H, Bligny R, Gout E, Dartevelle T, Hanchi M, Nakanishi TM, Thibaud MC, Nussaume L** (2016) Performance and Limitations of Phosphate Quantification: Guidelines for Plant Biologists. *Plant Cell Physiol* **57**: 690-706
- Karimi M, Inze D, Depicker A** (2002) GATEWAY vectors for Agrobacterium-mediated plant transformation. *Trends Plant Sci* **7**: 193-195
- Kasprzewska A, Carter R, Swarup R, Bennett M, Monk N, Hobbs JK, Fleming A** (2015) Auxin influx importers modulate serration along the leaf margin. *Plant J* **83**: 705-718
- Kawamura E, Horiguchi G, Tsukaya H** (2010) Mechanisms of leaf tooth formation in Arabidopsis. *Plant Journal* **62**: 429-441
- Kim JY, Symeonidi E, Pang TY, Denyer T, Weidauer D, Bezruczyk M, Miras M, Zollner N, Hartwig T, Wudick MM, Lercher M, Chen LQ, Timmermans MCP, Frommer WB** (2021) Distinct identities of leaf phloem cells revealed by single cell transcriptomics. *Plant Cell* **33**: 511-530
- Kobayashi K, Awai K, Nakamura M, Nagatani A, Masuda T, Ohta H** (2009) Type-B monogalactosyldiacylglycerol synthases are involved in phosphate starvation-induced lipid remodeling, and are crucial for low-phosphate adaptation. *Plant J* **57**: 322-331
- Kondo Y, Tamaki T, Fukuda H** (2014) Regulation of xylem cell fate. *Frontiers in Plant Science* **5**: 315
- Krouk G, Lacombe B, Bielach A, Perrine-Walker F, Malinska K, Mounier E, Hoyerova K, Tillard P, Leon S, Ljung K, Zazimalova E, Benkova E, Nacry P, Gojon A** (2010) Nitrate-regulated auxin transport by NRT1.1 defines a mechanism for nutrient sensing in plants. *Dev Cell* **18**: 927-937

- Kurihara D, Mizuta Y, Sato Y, Higashiyama T** (2015) ClearSee: a rapid optical clearing reagent for whole-plant fluorescence imaging. *Development* **142**: 4168-4179
- Le Roux C, Del Prete S, Boutet-Mercey S, Perreau F, Balague C, Roby D, Fagard M, Gaudin V** (2014) The hnRNP-Q protein LIF2 participates in the plant immune response. *PLoS One* **9**: e99343
- Lewis S, Goodman RN** (1966) The Glandular Trichomes, Hydathodes and Lenticels of Jonathan Apple and Their Relation to Infection by *Erwinia amylovora*. *Journal of phytopathology* **55**: 352-358
- Li F, Wu X, Lam P, Bird D, Zheng H, Samuels L, Jetter R, Kunst L** (2008) Identification of the wax ester synthase/acyl-coenzyme A: diacylglycerol acyltransferase WSD1 required for stem wax ester biosynthesis in Arabidopsis. *Plant Physiol* **148**: 97-107
- Li J, Brader G, Palva ET** (2004) The WRKY70 transcription factor: a node of convergence for jasmonate-mediated and salicylate-mediated signals in plant defense. *Plant Cell* **16**: 319-331
- Li W, Wang Y, Okamoto M, Crawford NM, Siddiqi MY, Glass AD** (2007) Dissection of the *AtNRT2.1:AtNRT2.2* inducible high-affinity nitrate transporter gene cluster. *Plant Physiol* **143**: 425-433
- Lopez MA, Vicente J, Kulasekaran S, Velloso T, Martinez M, Irigoyen ML, Cascon T, Bannenberg G, Hamberg M, Castresana C** (2011) Antagonistic role of 9-lipoxygenase-derived oxylipins and ethylene in the control of oxidative stress, lipid peroxidation and plant defence. *Plant J* **67**: 447-458
- Luhua S, Ciftci-Yilmaz S, Harper J, Cushman J, Mittler R** (2008) Enhanced tolerance to oxidative stress in transgenic Arabidopsis plants expressing proteins of unknown function. *Plant Physiol* **148**: 280-292
- Luneau JS, Baudin M, Quiroz Monnens T, Carrere S, Bouchez O, Jardinaud MF, Gris C, Francois J, Ray J, Torralba B, Arlat M, Lewis JD, Lauber E, Deutschbauer AM, Noël LD, Boulanger A** (2022) Genome-wide identification of fitness determinants in the *Xanthomonas campestris* bacterial pathogen during early stages of plant infection. *New Phytol*
- Luneau JS, Cerutti A, Roux B, Carrere S, Jardinaud MF, Gaillac A, Gris C, Lauber E, Berthome R, Arlat M, Boulanger A, Noël LD** (2022) *Xanthomonas* transcriptome inside cauliflower hydathodes reveals bacterial virulence strategies and physiological adaptations at early infection stages. *Mol Plant Pathol* **23**: 159-174

- Masclaux-Daubresse C, Clement G, Anne P, Routaboul JM, Guiboileau A, Soulay F, Shirasu K, Yoshimoto K** (2014) Stitching together the Multiple Dimensions of Autophagy Using Metabolomics and Transcriptomics Reveals Impacts on Metabolism, Development, and Plant Responses to the Environment in Arabidopsis. *Plant Cell* **26**: 1857-1877
- Maugarny-Cales A, Cortizo M, Adroher B, Borrega N, Goncalves B, Brunoud G, Vernoux T, Arnaud N, Laufs P** (2019) Dissecting the pathways coordinating patterning and growth by plant boundary domains. *PLoS Genet* **15**: e1007913
- Maugarny-Cales A, Laufs P** (2018) Getting leaves into shape: a molecular, cellular, environmental and evolutionary view. *Development* **145**
- Mishra BS, Jamsheer KM, Singh D, Sharma M, Laxmi A** (2017) Genome-Wide Identification and Expression, Protein-Protein Interaction and Evolutionary Analysis of the Seed Plant-Specific *BIG GRAIN* and *BIG GRAIN LIKE* Gene Family. *Front Plant Sci* **8**: 1812
- Misson J, Thibaud MC, Bechtold N, Raghothama K, Nussaume L** (2004) Transcriptional regulation and functional properties of Arabidopsis Pht1;4, a high affinity transporter contributing greatly to phosphate uptake in phosphate deprived plants. *Plant Mol Biol* **55**: 727-741
- Mravec J, Skupa P, Bailly A, Hoyerova K, Krecek P, Bielach A, Petrasek J, Zhang J, Gaykova V, Stierhof YD, Dobrev PI, Schwarzerova K, Rolcik J, Seifertova D, Luschnig C, Benkova E, Zazimalova E, Geisler M, Friml J** (2009) Subcellular homeostasis of phytohormone auxin is mediated by the ER-localized PIN5 transporter. *Nature* **459**: 1136-1140
- Mudge SR, Rae AL, Diatloff E, Smith FW** (2002) Expression analysis suggests novel roles for members of the Pht1 family of phosphate transporters in Arabidopsis. *Plant J* **31**: 341-353
- Mullens A, Jamann TM** (2021) Colonization and Movement of Green Fluorescent Protein-Labeled *Clavibacter nebraskensis* in Maize. *Plant Dis* **105**: 1422-1431
- Muller-Moule P, Nozue K, Pytlak ML, Palmer CM, Covington MF, Wallace AD, Harmer SL, Maloof JN** (2016) *YUCCA* auxin biosynthetic genes are required for Arabidopsis shade avoidance. *PeerJ* **4**: e2574
- Mutterer J, Zinck E** (2013) Quick-and-clean article figures with FigureJ. *J Microsc* **252**: 89-91



- Nagai M, Ohnishi M, Uehara T, Yamagami M, Miura E, Kamakura M, Kitamura A, Sakaguchi S, Sakamoto W, Shimmen T, Fukaki H, Reid RJ, Furukawa A, Mimura T** (2013) Ion gradients in xylem exudate and guttation fluid related to tissue ion levels along primary leaves of barley. *Plant Cell Environ* **36**: 1826-1837
- Nazoa P, Vidmar JJ, Tranbarger TJ, Mouline K, Damiani I, Tillard P, Zhuo D, Glass AD, Touraine B** (2003) Regulation of the nitrate transporter gene *AtNRT2.1* in *Arabidopsis thaliana*: responses to nitrate, amino acids and developmental stage. *Plant Mol Biol* **52**: 689-703
- Nobusawa T, Okushima Y, Nagata N, Kojima M, Sakakibara H, Umeda M** (2013) Synthesis of very-long-chain fatty acids in the epidermis controls plant organ growth by restricting cell proliferation. *PLoS Biol* **11**: e1001531
- Patwari P, Salewski V, Gutbrod K, Kreszies T, Dresen-Scholz B, Peisker H, Steiner U, Meyer AJ, Schreiber L, Dormann P** (2019) Surface wax esters contribute to drought tolerance in *Arabidopsis*. *Plant J* **98**: 727-744
- Pecrix Y, Staton SE, Sallet E, Lelandais-Briere C, Moreau S, Carrere S, Blein T, Jardinaud MF, Latrasse D, Zouine M, Zahm M, Kreplak J, Mayjonade B, Satge C, Perez M, Cauet S, Marande W, Chantry-Darmon C, Lopez-Roques C, Bouchez O, Berard A, Debelle F, Munos S, Bendahmane A, Berges H, Niebel A, Buitink J, Frugier F, Benhamed M, Crespi M, Gouzy J, Gamas P** (2018) Whole-genome landscape of *Medicago truncatula* symbiotic genes. *Nat Plants* **4**: 1017-1025
- Perrin A** (1972) Contribution à l'étude de l'organisation et du fonctionnement des hydathodes: recherches anatomiques ultrastructurales et physiologiques. Université Claude Bernard - Lyon
- Pilot G, Gaymard F, Mouline K, Cherel I, Sentenac H** (2003) Regulated expression of *Arabidopsis* shaker K<sup>+</sup> channel genes involved in K<sup>+</sup> uptake and distribution in the plant. *Plant Mol Biol* **51**: 773-787
- Pilot G, Stransky H, Bushey DF, Pratelli R, Ludewig U, Wingate VPM, Frommer WB** (2004) Overexpression of *GLUTAMINE DUMPER1* leads to hypersecretion of glutamine from hydathodes of *Arabidopsis* leaves. *Plant Cell* **16**: 1827-1840
- Pratelli R, Voll LM, Horst RJ, Frommer WB, Pilot G** (2010) Stimulation of nonselective amino acid export by glutamine dumper proteins. *Plant Physiol* **152**: 762-773
- Ranocha P, Dima O, Nagy R, Felten J, Corratge-Faillie C, Novak O, Morreel K, Lacombe B, Martinez Y, Pfrunder S, Jin X, Renou JP, Thibaud JB, Ljung K, Fischer U,**

- Martinoia E, Boerjan W, Goffner D** (2013) Arabidopsis WAT1 is a vacuolar auxin transport facilitator required for auxin homeostasis. *Nat Commun* **4**: 2625
- Redovnikovic IR, Textor S, Lisnic B, Gershenzon J** (2012) Expression pattern of the glucosinolate side chain biosynthetic genes *MAM1* and *MAM3* of *Arabidopsis thaliana* in different organs and developmental stages. *Plant Physiol Biochem* **53**: 77-83
- Rekhter D, Ludke D, Ding Y, Feussner K, Zienkiewicz K, Lipka V, Wiermer M, Zhang Y, Feussner I** (2019) Isochorismate-derived biosynthesis of the plant stress hormone salicylic acid. *Science* **365**: 498-502
- Robinson MD, Oshlack A** (2010) A scaling normalization method for differential expression analysis of RNA-seq data. *Genome Biol* **11**: R25
- Sabatini S, Beis D, Wolkenfelt H, Murfett J, Guilfoyle T, Malamy J, Benfey P, Leyser O, Bechtold N, Weisbeek P, Scheres B** (1999) An auxin-dependent distal organizer of pattern and polarity in the Arabidopsis root. *Cell* **99**: 463-472
- Schuster J, Knill T, Reichelt M, Gershenzon J, Binder S** (2006) Branched-chain aminotransferase4 is part of the chain elongation pathway in the biosynthesis of methionine-derived glucosinolates in Arabidopsis. *Plant Cell* **18**: 2664-2679
- Shibagaki N, Rose A, McDermott JP, Fujiwara T, Hayashi H, Yoneyama T, Davies JP** (2002) Selenate-resistant mutants of *Arabidopsis thaliana* identify *Sultr1;2*, a sulfate transporter required for efficient transport of sulfate into roots. *Plant J* **29**: 475-486
- Shin H, Shin HS, Dewbre GR, Harrison MJ** (2004) Phosphate transport in Arabidopsis: Pht1;1 and Pht1;4 play a major role in phosphate acquisition from both low- and high-phosphate environments. *Plant J* **39**: 629-642
- Shin R, Burch AY, Huppert KA, Tiwari SB, Murphy AS, Guilfoyle TJ, Schachtman DP** (2007) The Arabidopsis transcription factor MYB77 modulates auxin signal transduction. *Plant Cell* **19**: 2440-2453
- Staswick PE, Serban B, Rowe M, Tiryaki I, Maldonado MT, Maldonado MC, Suza W** (2005) Characterization of an Arabidopsis enzyme family that conjugates amino acids to indole-3-acetic acid. *Plant Cell* **17**: 616-627
- Torrens-Spence MP, Bobokalonova A, Carballo V, Glinkerman CM, Pluskal T, Shen A, Weng JK** (2019) PBS3 and EPS1 Complete Salicylic Acid Biosynthesis from Isochorismate in Arabidopsis. *Mol Plant* **12**: 1577-1586
- van Loon LC, Rep M, Pieterse CM** (2006) Significance of inducible defense-related proteins in infected plants. *Annu Rev Phytopathol* **44**: 135-162

- Wang W, Xu B, Wang H, Li J, Huang H, Xu L** (2011) *YUCCA* genes are expressed in response to leaf adaxial-abaxial juxtaposition and are required for leaf margin development. *Plant Physiology* **157**: 1805-1819
- Wang XC, Wu J, Guan ML, Zhao CH, Geng P, Zhao Q** (2020) Arabidopsis MYB4 plays dual roles in flavonoid biosynthesis. *Plant J* **101**: 637-652
- Whitford R, Fernandez A, Tejos R, Perez AC, Kleine-Vehn J, Vanneste S, Drozdzecki A, Leitner J, Abas L, Aerts M, Hoogewijs K, Baster P, De Groodt R, Lin YC, Storme V, Van de Peer Y, Beeckman T, Madder A, Devreese B, Luschnig C, Friml J, Hilson P** (2012) GOLVEN secretory peptides regulate auxin carrier turnover during plant gravitropic responses. *Dev Cell* **22**: 678-685
- Xie Q, Frugis G, Colgan D, Chua NH** (2000) Arabidopsis NAC1 transduces auxin signal downstream of TIR1 to promote lateral root development. *Genes Dev* **14**: 3024-3036
- Yadav S, Yadav PK, Yadav D, Yadav KDS** (2009) Pectin lyase: A review. *Process Biochemistry* **44**: 1-10
- Yagi H, Nagano AJ, Kim J, Tamura K, Mochizuki N, Nagatani A, Matsushita T, Shimada T** (2021) Fluorescent protein-based imaging and tissue-specific RNA-seq analysis of Arabidopsis hydathodes. *J Exp Bot* **72**: 1260-1270
- Yang N, Zhang Y, Chen L, Wang W, Liu R, Gao R, Zhou Y, Li H** (2021) G protein and PLDdelta are involved in JA to regulate osmotic stress responses in *Arabidopsis thaliana*. *Biochem Biophys Rep* **26**: 100952
- Zabackis E, Huang J, Muller B, Darvill AG, Albersheim P** (1995) Characterization of the cell-wall polysaccharides of *Arabidopsis thaliana* leaves. *Plant Physiol* **107**: 1129-1138
- Zamil MS, Geitmann A** (2017) The middle lamella-more than a glue. *Phys Biol* **14**: 015004
- Zhang Y, Zhao L, Zhao J, Li Y, Wang J, Guo R, Gan S, Liu CJ, Zhang K** (2017) *S5H/DMR6* Encodes a Salicylic Acid 5-Hydroxylase That Fine-Tunes Salicylic Acid Homeostasis. *Plant Physiol* **175**: 1082-1093
- Zhao L, Wang Y** (2017) Nitrate Assay for Plant Tissues. *Bio Protoc* **7**: e2029
- Zhou N, Tootle TL, Tsui F, Klessig DF, Glazebrook J** (1998) PAD4 functions upstream from salicylic acid to control defense responses in Arabidopsis. *Plant Cell* **10**: 1021-1030

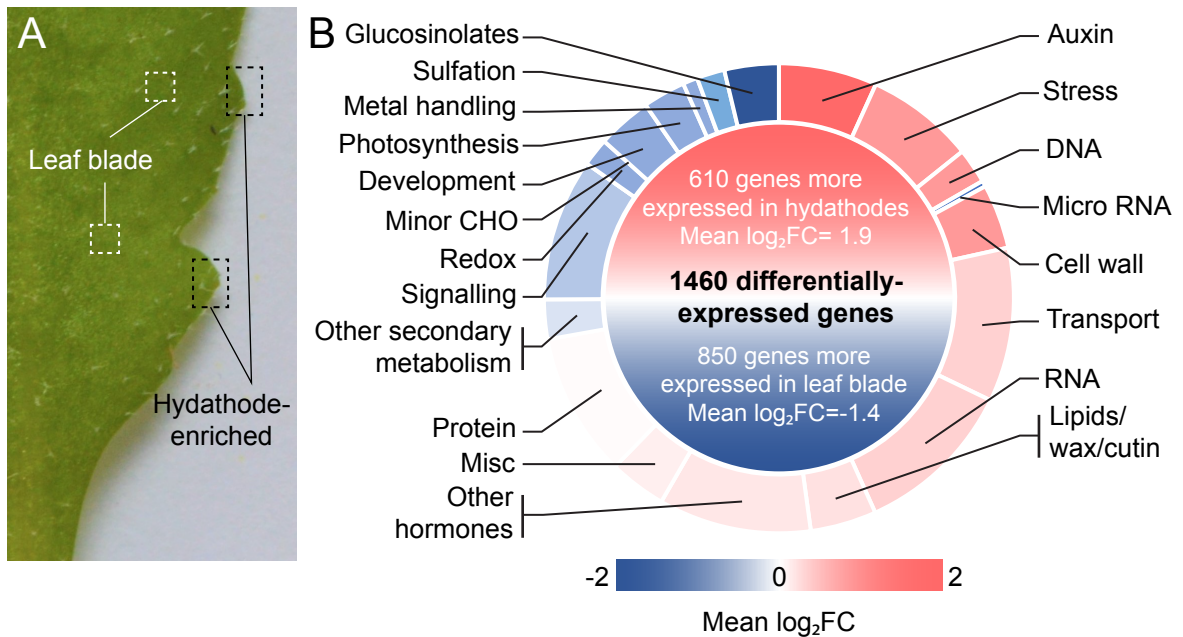

**Figure 1:** Transcriptomic analysis of hydathode-enriched versus leaf blade samples identifies 1460 differentially-expressed genes (DEG,  $FDR < 0.001$ ) in mature *Arabidopsis* leaves. (A) Leaf teeth (hydathode enriched) and leaf blade samples were macro-dissected from nine- to ten-week-old plant leaves and subjected to RNA sequencing. (B) Functional categorization of the 1087 genes differentially-expressed genes with a functional annotation. DEG were mainly annotated using the MapMan analysis classification available from the BAR site ([https://bar.utoronto.ca/ntools/cgi-bin/ntools\\_classification\\_superviewer.cgi](https://bar.utoronto.ca/ntools/cgi-bin/ntools_classification_superviewer.cgi)) and expert annotation extracted from literature (See Table S3). A color key is proportional to the mean  $\log_2$  Fold Change ( $\log_2FC$ ) of the genes belonging to the given functional category that were globally either more expressed in hydathodes (in red) or in the leaf blade (in blue).

Figure 1  
Routaboul et al.

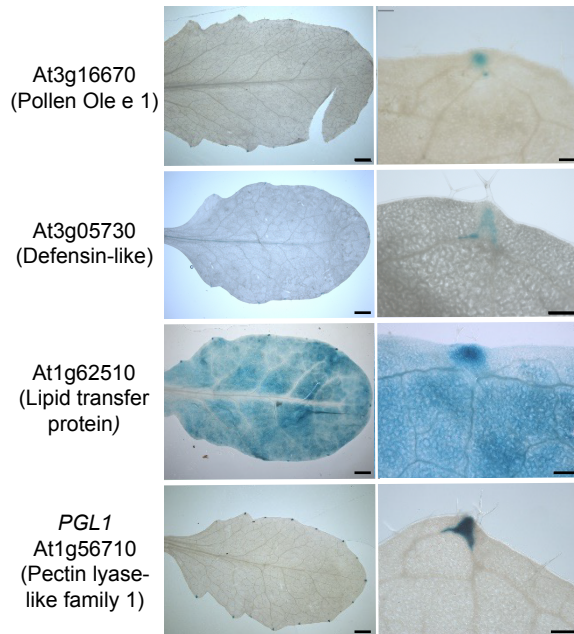

**Figure 2:** Detection of GUS activity (blue) in leaves of eight-week-old transgenic plants carrying promoter:*GUS* reporter fusions for *Pollen Ole e 1* (At3g16670), *Defensin-like* (At3g05730), *Lipid transfer protein* (At1g62510) and *Pectin lyase-like family PGL1* (At1g56710). Scale bars = 2 mm (Left panels), 200  $\mu$ m (Right panels).

Figure 2  
Routaboul et al.

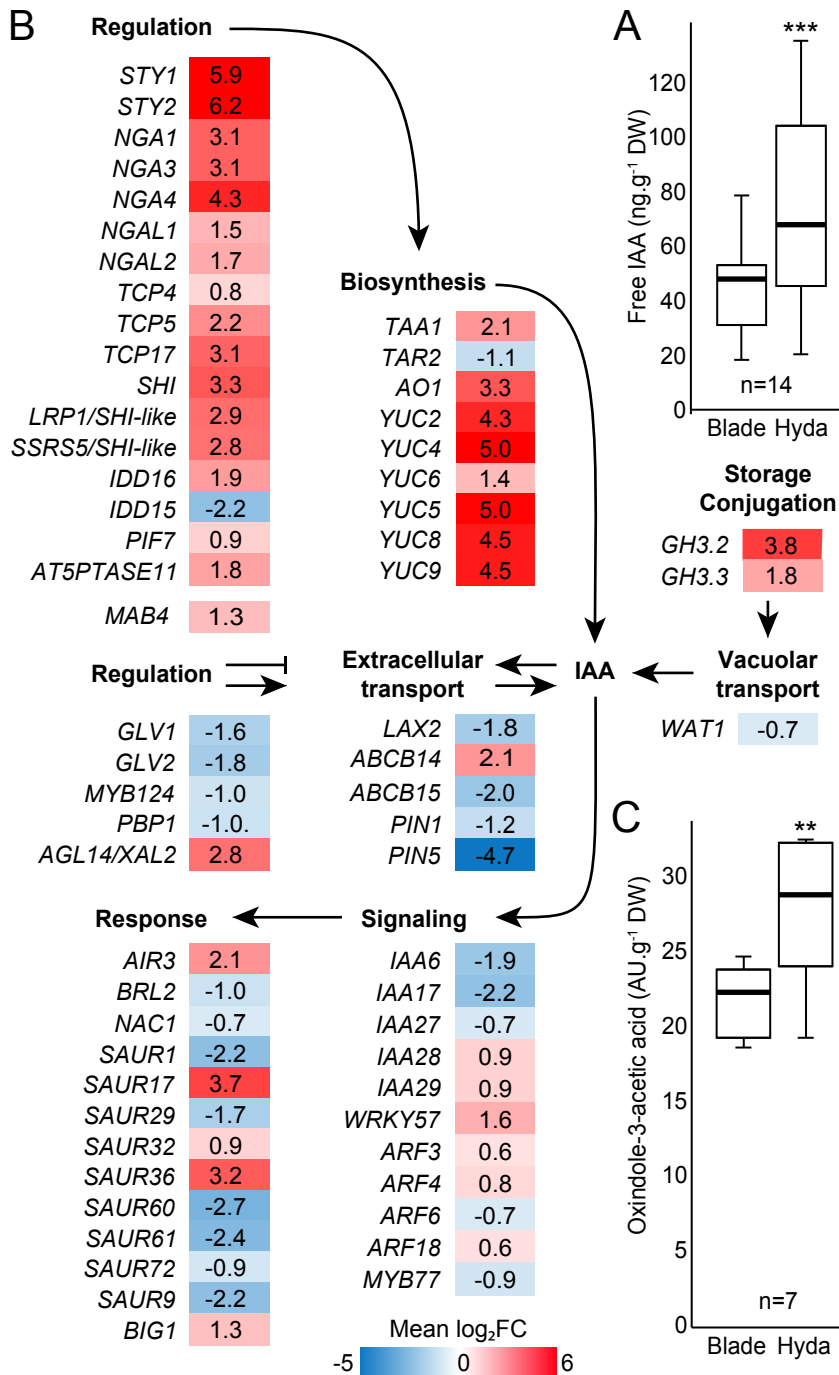

**Figure 3:** Hydathodes are important organs for auxin metabolism and accumulation in mature *Arabidopsis* leaves. (A) Boxplot representation of concentrations of free indole-acetic acid (IAA) in leaf blade (Blade) and hydathodes (Hyda) of eight-week-old plants were determined by GC-MS. (B) Expression ratio (Hydathodes vs. leaf blade) of differentially-expressed genes (DEG, Table S3) important for auxin biology, including biosynthetic genes and their regulators, transporter genes and their regulators as well as their downstream signaling components and auxin-responsive genes. Genes more expressed in hydathodes are shown in red, those more expressed in leaf blade in blue. Numbers refer to mean log<sub>2</sub> fold change (log<sub>2</sub>FC). (C) Boxplot representation of concentrations of auxin conjugate precursor oxindole-3-acetic acid in leaf blade (Blade) and hydathodes (Hyda) of eight-week-old plants were determined by GC-MS. Statistically significant differences were determined using a paired t-test (\*\*, p<0.01; \*\*\*, p<0.001). n= number of biological replicates.

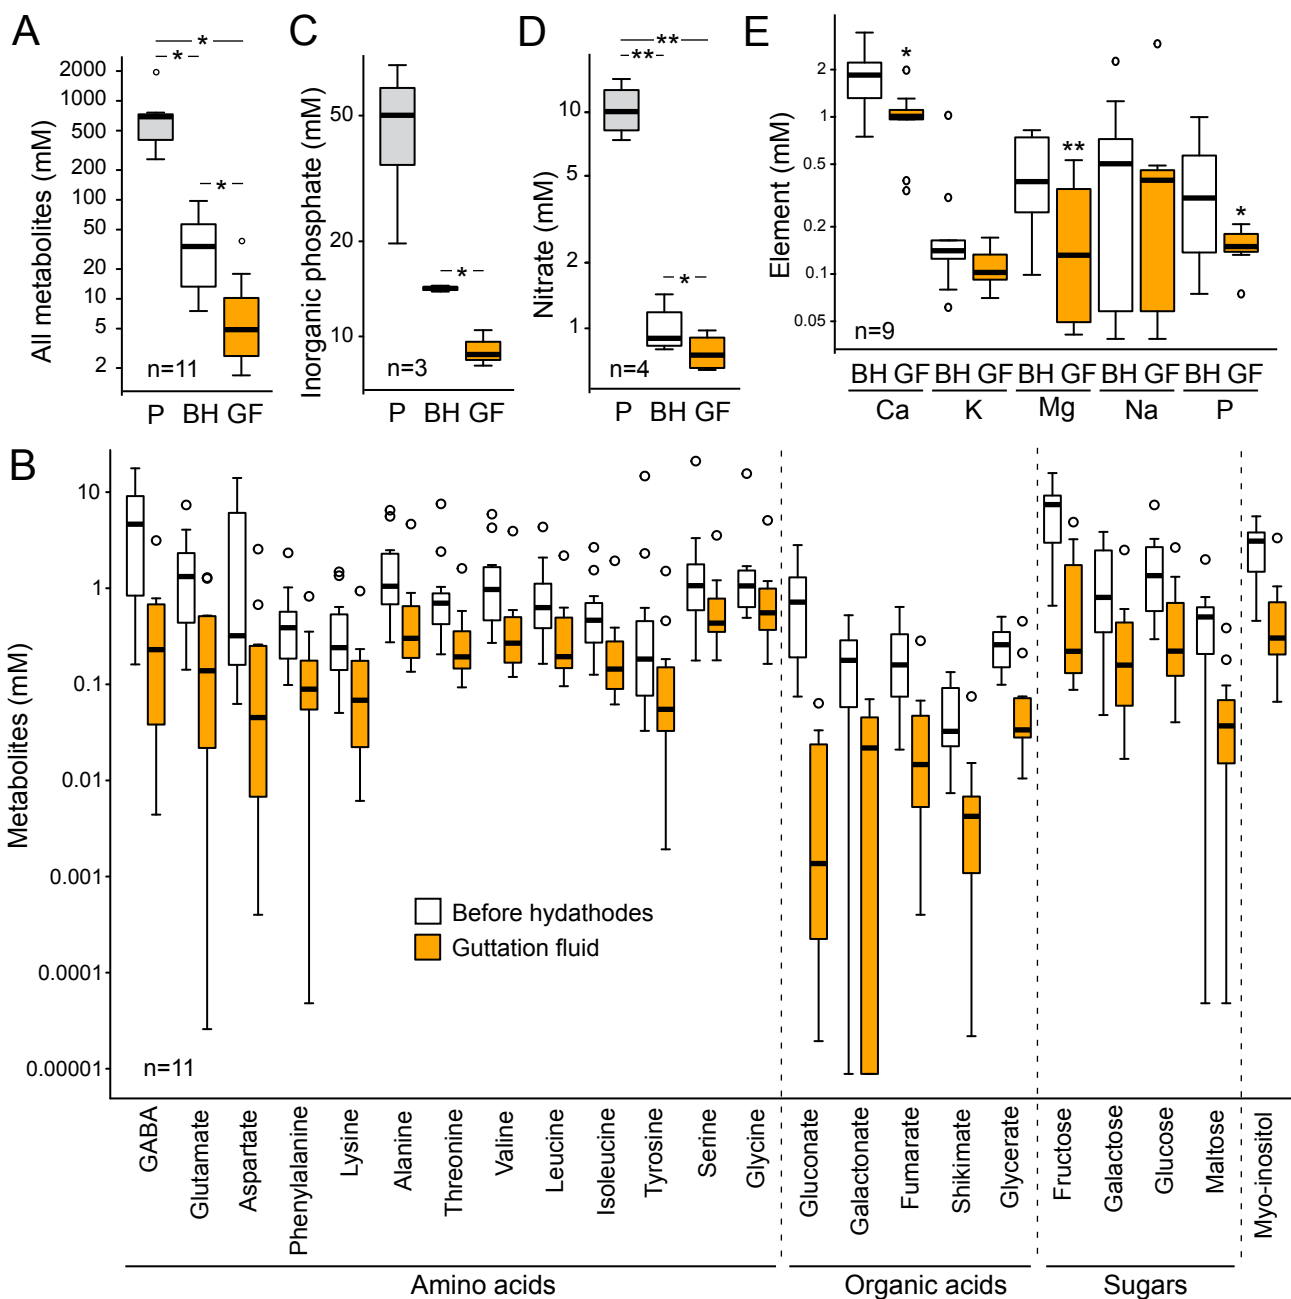

**Figure 4:** Metabolomic analysis of fluids collected at the petiole (P), before hydathodes (BH) or at the leaf margin (guttation fluid, GF) of leaves from four-week-old plants. (A, B) Concentrations of 52 metabolites were determined by GC-MS in P, BH and G fluids (Table S4). (A) Boxplot representation of total metabolite concentrations in the three types of samples. (B) Box plot representation of 23 out of the 52 metabolites which are in significantly lower concentrations in the guttation fluid (GF) compared to the fluids sampled before hydathodes (BH). Statistically significant differences were determined using non-parametric Kruskal-Wallis test ( $p < 0.05$ ). (C) Boxplot representation of nitrate concentrations in P, BH and G fluids. (D) Boxplot representation of inorganic phosphate concentrations in P, BH and G fluids. (E) Boxplot representation of mineral elements concentrations in P, BH and G fluids measured with ICP-MS. (C,D) Statistically significant differences were determined using a paired  $t$ -test (\*,  $p < 0.05$ ; \*\*,  $p < 0.01$ ).  $n$  = number of biological replicates.

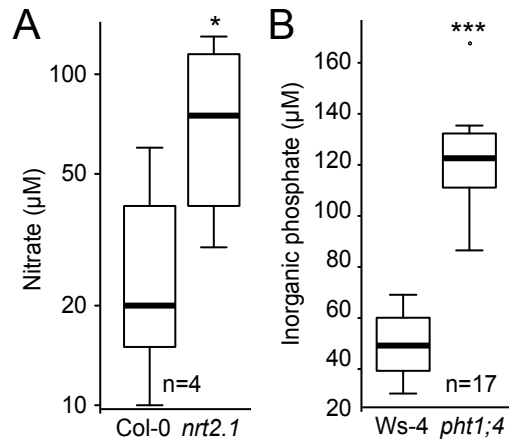

**Figure 5:** NRT2.1 nitrate and PHT1;4 phosphate transporters are important to capture nitrate and phosphate in hydathodes, respectively. Boxplot representations of nitrate (A) and inorganic phosphate (B) concentrations measured in guttation fluids of *nrt2.1* (N859604) and *pht1;4-1* mutants relative to their wild-type controls Col-0 and Ws-4, respectively. Statistically significant differences were determined using a paired *t*-test (\*,  $p < 0.05$ ; \*\*\*,  $p < 0.001$ ). *n* = number of biological replicates.

Figure 5  
 Routaboul et al.



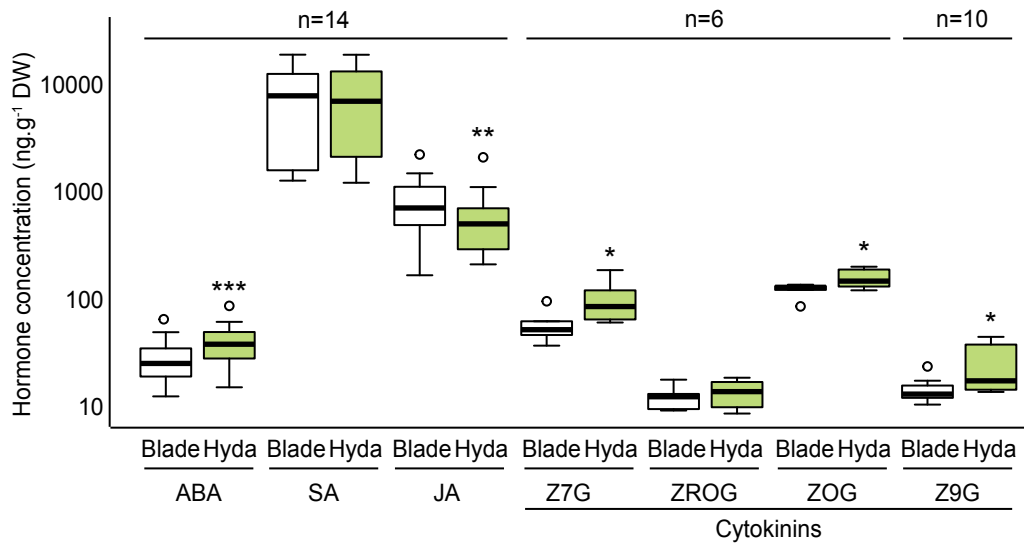

**Figure 6:** Boxplot representation of plant hormones concentrations in leaf blade (Blade) and hydathodes (Hyda) of eight-week-old plants as measured by GC-MS: abscisic acid (ABA), salicylic acid (SA), jasmonic acid (JA) and cytokinins (zeatin-7- $\beta$ -D-glucoside (Z7G), trans-zeatin-o-glucoside riboside (ZROG), zeatin-o-glucoside (ZOG), zeatin-9- $\beta$ -D-glucoside (Z9G)). Statistically significant differences were determined using a paired *t*-test (\*,  $p < 0.05$ ; \*\*\*,  $p < 0.001$ ). n= number of biological replicates.

Figure 6  
Routaboul et al.
